# Supplementary material for: Modulatory effects of fermentedPolygonatum cyrtonemaHua on immune homeostasis and gut integrity in a dextran-sulfate-sodium-induced colitis model
Source: Royal Society of Chemistry journal article supplement (doi:10.1039/d3fo04556k), 2024-01-01
Supplement: d3fo04556k1.xlsx [file d3fo04556k1.xlsx]

## Sheet: Figure1
Change of BW %																									Spleen index
	NC												PC												NC	PC	FPL	FPH
day	NC1	NC2	NC3	NC4	NC5	NC6	NC7	NC8	NC9	NC10	NC11	NC12	PC1	PC2	PC3	PC4	PC5	PC6	PC7	PC8	PC9	PC10	PC11	PC12	0.35567	0.642424	0.519481	0.352332
1	1.00503	2.98508	-0.98522	-6	1.53846	-6.37255	-2.03046	-5.14019	-4	-2.53807	-4.32692	-4.63918	-0.98522	-3	-1.91388	-3.51759	0	-5.6338	-0.48077	-3.38164	-1.07527	-2.42718	-1.52284	-2.55102	0.37234	0.657303	0.502793	0.396907
2	-4.52261	-0.99502	-4.92611	-4	-2.5641	1.47059	-6.09137	-8.8785	-6.28571	-5.58376	-6.25	-6.70103	-5.41872	-8.5	-4.30622	-4.52261	-1.03093	-5.6338	-3.84615	-7.72947	-5.91398	-2.91262	-7.1066	-7.65306	0.38191	0.384106	0.433962	0.422886
3	-4.52261	-3.9801	1.47783	-3.5	-4.10256	1.47059	-9.13706	-10.7477	-6.28571	-10.1523	-10.0962	-6.18557	-7.88177	-10	-4.78469	-6.53266	-5.6701	-5.16432	-4.80769	-8.21256	-5.91398	-7.28155	-6.09137	-8.67347	0.365169	0.643617	0.297468	0.322917
4	-5.02513	-3.9801	-0.98522	-3	-5.64103	-0.98039	-6.09137	-12.1495	-6.85714	-9.64467	-7.69231	-7.21649	-7.38916	-11	-7.6555	-7.03518	-5.6701	-6.57277	-5.76923	-9.17874	-6.45161	-8.73786	-7.1066	-9.18367	0.347594	0.51497	0.439024	0.427746
5	-9.04523	-5.47264	-0.49261	-4.5	-8.20513	-9.80392	-8.12183	-13.5514	-10.2857	-11.6751	-9.61538	-9.27835	-7.88177	-12.5	-10.0478	-7.03518	-5.15464	-9.85915	-8.17308	-11.5942	-7.52688	-8.73786	-7.61421	-10.2041	0.38191	0.822368	0.352564	0.371134
6	-9.04523	-6.96517	0	-9	-7.69231	5.39216	-8.12183	-10.2804	-6.85714	-8.62944	-8.65385	-7.21649	-6.40394	-11	-6.2201	-7.53769	-8.24742	-7.04225	-5.28846	-9.17874	-9.13978	-7.28155	-5.58376	-6.12245
7	-7.03518	-6.46766	-0.49261	-6.5	-9.23077	1.96078	-7.1066	-8.8785	-9.71429	-5.07614	-10.0962	-7.21649	-7.88177	-11	-6.2201	-5.52764	-2.57732	-6.10329	-7.69231	-12.5604	-8.60215	-7.76699	-6.59898	-9.18367
8	-3.01508	-3.48259	2.46305	-4.5	-4.10256	3.43137	1.01523	-11.6822	-8.57143	-8.12183	-7.21154	-5.6701	-4.92611	-7	-4.30622	-4.52261	-2.06186	-4.69484	-4.80769	-6.28019	-3.76344	-8.25243	-2.03046	-5.10204
9	-3.51759	-2.48756	-1.97044	-5	-3.07692	1.47059	-8.12183	-13.0841	-8.57143	-7.1066	-7.69231	-6.70103	-5.91133	-10.5	-6.69856	-6.53266	-3.60825	-4.69484	-3.36538	-13.0435	-4.30108	-11.6505	-2.03046	-5.10204
10	-2.51256	-0.99502	0.985222	-4	-7.17949	-1.47059	-8.62944	-12.6168	-7.42857	-7.1066	-6.25	-4.63918	-5.91133	-10.5	-6.69856	-8.0402	-1.54639	-7.04225	-3.84615	-10.1449	-4.30108	-12.1359	-4.06091	-4.08163
11	-7.03518	-2.98507	1.47783	-6.5	-7.17949	-4.90196	-5.58376	-11.6822	-6.28571	-7.61421	-8.17308	-4.63918	-8.37438	-13	-7.17703	-8.0402	-2.06186	-5.6338	-4.32692	-10.628	-4.30108	-17.4757	-6.59898	-6.63265
12	-5.52764	-2.48756	0	-6	-5.12821	2.94118	-6.09137	-12.1495	-4.57143	-5.58376	-9.61538	-2.57732	-12.8079	-18	-11.4833	-12.0603	-9.79381	-9.38967	-11.0577	-13.5266	-11.2903	-25.2427	-10.1523	-8.67347
13	-3.01508	-0.49751	-0.49261	-4.5	-3.07692	2.45098	-8.62944	-11.215	-4	-8.12183	-3.36538	-2.57732	-18.2266	-25	-13.8756	-17.5879	-16.4948	-11.2676	-13.9423	-22.2222	-16.6667	-32.5243	-14.7208	-12.7551
14	-2.51256	1.49254	-3.44828	-3.5	-3.58974	0.490196	-9.64467	-8.8785	-3.42857	-5.07614	-4.32692	-3.60825	-25.1232	-32.5	-14.8325	-25.1256	-22.1649	-11.7371	-19.7115	-26.57	-23.6559	-11.7251	-23.3503	-15.8163
	Change of BW %
	FPL												FPH
	FPL1	FPL2	FPL3	FPL4	FPL5	FPL6	FPL7	FPL8	FPL9	FPL10	FPL11	FPL12	FPH1	FPH2	FPH3	FPH4	FPH5	FPH6	FPH7	FPH8	FPH9	FPH10	FPH11	FPH12
1	-6.70103	-5.02283	-2.59067	-1.63934	0	-2.71739	0	-7.58294	-2.5	-3.15789	-3.43137	-1.47783	0	-0.46512	0	-0.9434	-0.5102	0	1.44231	-1.0929	0.518135	-3	-4.14508	1.39535
2	-6.70103	-9.13242	-3.10881	-1.0929	-1	-2.17391	-3.62694	-7.109	-4.5	-6.84211	-6.86275	-10.3448	-4.4335	-3.72093	-4.90196	-5.18868	-2.04082	-5	-1.44231	-1.63934	1.5544	-8	-6.73575	-2.32558
3	-8.76289	-9.13242	-6.21762	-4.37158	0	-3.26087	-2.07254	-8.05687	-4.5	-4.73684	-7.35294	-9.85222	-6.89655	-6.04651	-1.47059	-3.30189	-2.04082	-6.5	1.92308	-1.63934	5.18135	-9	-6.73575	-6.97674
4	-7.21649	-6.84932	-4.14508	-3.27869	-7	-3.80435	-1.5544	-9.95261	-3	-4.21053	-6.86275	-6.89655	-0.98522	-7.44186	-2.94118	-3.30189	-3.06122	-3	0.961538	1.0929	4.66321	-9	-3.62694	-4.65116
5	-8.76289	-7.30594	-7.77202	-5.46448	-6.5	-8.69565	-4.14508	-9.00474	-7	-7.89474	-8.33333	-7.38916	-1.97044	-11.1628	-7.84314	-7.54717	-6.63265	-6	-3.36538	-2.73224	-2.59067	-10	-7.77202	-8.83721
6	-8.76289	-8.21918	-6.21762	-3.82514	-5	-8.69565	-1.03627	-8.05687	-6	-2.63158	-3.43137	-6.89655	-3.94089	-9.76744	-7.35294	-5.18868	-6.12245	-4.5	-1.92308	-2.73224	0	-9.5	-7.25389	-6.04651
7	-10.3093	-5.93607	-5.18135	-2.73224	-3.5	-5.43478	-4.14508	-8.53081	-4.5	-4.21053	-7.35294	-11.33	-0.98522	-6.97674	-9.31373	-5.18868	-4.08163	-5	-0.96154	-3.27869	-0.51813	-7.5	-5.18135	-6.51163
8	-11.8557	-9.58904	-3.62694	-2.73224	-4	-4.34783	-4.14508	-9.00474	-6.5	-6.84211	-4.90196	-8.37438	-1.47783	-5.11628	-5.88235	-2.83019	-3.06122	-4	0	-2.73224	6.73575	-5.5	-4.14508	-3.72093
9	-11.8557	-9.13242	-6.21762	17.4863	-6.5	6.52174	-4.14508	-7.109	-7	-4.73684	-7.35294	-8.867	-2.95567	-7.44186	-7.35294	-1.88679	-3.57143	-5	-2.88462	-4.91803	2.07254	-9.5	-2.07254	-4.18605
10	-5.6701	-7.30594	-2.07254	1.0929	-6	-1.08696	-4.66321	-4.73934	-6.5	-3.68421	-2.94118	-2.46305	-2.46305	-8.37209	-5.39216	-3.77358	-2.55102	-4.5	-0.48077	-1.0929	1.5544	-7	-1.5544	-4.18605
11	-5.6701	-4.56621	-4.14508	0.546448	-6	-5.43478	-6.21762	-5.6872	-7	-6.84211	-7.35294	-1.97044	-1.47783	-4.18605	-4.41176	-1.88679	-1.02041	-2.5	0	-0.54645	0.518135	-7.5	-2.59067	-5.11628
12	-9.79381	-7.76256	-8.80829	-1.63934	-8	-6.52174	-8.29016	-12.3223	-12	-11.0526	-11.7647	-6.40394	0.492611	-6.04651	-5.88235	-2.35849	-1.53061	-2	0.480769	-1.63934	3.62694	-3.5	-1.5544	-3.25581
13	-15.4639	-14.1553	-12.4352	-7.65027	-11.5	-16.3043	-15.544	-17.0616	-17	-12.1053	-24.0196	-8.37438	-0.98522	-5.11628	-6.37255	-4.24528	-3.06122	-4.5	0	-3.27869	1.5544	-5.5	-5.18135	-4.18605
14	-20.6186	-18.2648	-17.6166	-12.0219	-21	-22.8261	-23.8342	-22.2749	-22	-11.0526	-15.1961	-8.867	-4.92611	-9.76744	-10.2941	-5.18868	-4.59184	-9.5	-2.88462	-5.46448	0.518135	-9	-6.73575	-10.6977
DAI score
	NC												PC
day/number	NC1	NC2	NC3	NC4	NC5	NC6	NC7	NC8	NC9	NC10	NC11	NC12	PC1	PC2	PC3	PC4	PC5	PC6	PC7	PC8	PC9	PC10	PC11	PC12
1	0	0	1	2	0	2	1	2	1	1	1	1	1	1	1	1	0	2	1	1	1	1	1	1
2	2	1	1	0	1	0	1	1	1	1	1	1	1	2	1	1	1	0	1	1	1	1	2	2
3	0	1	0	0	1	0	1	1	0	1	1	0	1	1	1	1	1	0	1	1	0	1	0	1
4	1	0	1	0	1	1	0	1	1	0	0	1	0	1	1	1	0	1	1	1	1	1	1	1
5	1	1	1	1	1	3	1	1	1	1	1	1	1	1	1	0	0	1	1	1	1	0	1	1
6	0	1	0	1	0	0	0	0	0	0	0	0	0	0	0	1	1	0	0	0	1	0	0	0
7	0	0	1	0	1	0	0	0	1	0	1	0	1	0	0	0	0	0	1	1	0	1	1	1
8	0	0	0	0	0	0	0	1	0	1	0	0	1	1	1	2	1	1	1	2	1	2	1	2
9	1	0	1	1	0	0	2	1	0	0	1	1	2	2	2	1	2	1	1	3	2	2	1	1
10	0	0	0	0	1	1	1	0	0	0	0	0	1	1	2	2	1	3	2	3	1	5	2	1
11	1	1	0	1	0	2	0	0	0	1	1	0	3	6	3	3	3	2	5	5	4	7	5	5
12	0	0	0	0	0	0	1	1	0	0	1	0	7	7	5	5	6	4	8	6	6	6	5	6
13	0	0	1	0	0	0	1	0	0	1	0	0	5	8	7	7	7	7	6	8	8	8	8	6
14	0	0	1	0	1	0	1	0	0	0	1	1	8	9	6	7	8	6	8	5	7	0	8	7
	DAI score
	FPL												FPH
	FPL1	FPL2	FPL3	FPL4	FPL5	FPL6	FPL7	FPL8	FPL9	FPL10	FPL11	FPL12	FPH1	FPH2	FPH3	FPH4	FPH5	FPH6	FPH7	FPH8	FPH9	FPH10	FPH11	FPH12
1	2	1	1	1	0	1	0	2	1	1	1	1	0	1	0	1	1	0	0	1	0	1	1	0
2	0	1	1	0	1	0	1	0	1	1	1	2	1	1	1	1	1	2	1	1	0	2	1	1
3	1	0	1	1	0	1	0	1	0	0	1	0	1	1	0	0	0	1	0	0	0	1	0	1
4	0	0	0	0	2	1	0	1	0	0	0	0	0	1	1	0	1	0	1	0	1	0	0	0
5	1	1	1	1	0	2	1	0	1	1	1	1	1	1	2	1	1	1	1	1	2	1	1	1
6	0	1	0	0	0	0	0	0	0	0	0	0	1	0	0	0	0	0	0	0	0	0	0	0
7	1	0	0	0	0	0	1	1	0	1	1	1	0	0	1	0	0	1	0	1	1	0	0	1
8	2	2	1	1	2	1	1	3	2	2	1	1	1	0	0	1	1	1	1	1	1	1	1	1
9	1	1	3	1	2	1	2	1	3	1	1	2	2	2	2	1	2	2	2	2	2	2	1	2
10	2	2	1	4	1	3	2	2	2	1	0	2	1	2	1	2	2	1	1	1	2	1	1	1
11	5	3	5	5	4	4	4	5	4	4	5	3	3	2	3	2	2	2	2	2	3	4	5	4
12	5	6	5	6	6	7	6	7	6	4	5	5	3	4	4	4	4	4	3	4	3	3	3	3
13	8	7	5	7	7	9	5	6	8	6	9	7	4	5	6	6	6	5	5	5	5	6	5	5
14	8	7	7	7	9	8	9	7	6	4	4	5	5	6	5	5	5	4	4	5	4	4	3	5

## Sheet: Figure 2
plasma cyctokine TNF-a：pg/mL					plasma cyctokine MCP-1：pg/mL					Blood Treg cell/%					Blood Th1 cell/%
NC	PC	FPL	FPH		NC	PC	FPL	FPH		NC	PC	FPH			NC	PC	FPH
48.67	74.91	53.03	55.22		34.85	79.36	34.12	27.55		6.96	3.04	4.5			1.31	3.18	1.8
53.04	74.95	53.04	46.48		16.6	47.25	47.98	28.28		6.8	3.95	5.39			1.5	2.18	1.6
50.85	57.41	48.67	50.85		12.95	52.36	49.44	29.74		6.51	2.68	4.68			0.94	2.51	1.96
51.84	69.08	51.55	47.05		20.45	59.66	46.62	30.41		6.76	3.23	5.45			1.58	3.68	1.9
47.81	70.22	48.91	50.64		21.5	60.56	40.94	28.53		6.85	2.86	4.86			1.34	2.92	1.83
51.23	68.03	54.12	53.93		22.33	58.73	43.9	26.62		6.7	3.57	4.26			1.32	2.81	1.79
plasma cyctokine IL-6：pg/mL
NC	PC	FPL	FPH
5.625	65.625	28.125	33.125							Blood Th2 cell/%					Blood Th17 cell/%
8.125	91.875	45.625	26.875							NC	PC	FPH			NC	PC	FPH
4.375	91.873	30.625	26.875							1.03	0.39	0.8			1.09	4.24	1.26
6.12	83.24	35.8	27.71							0.82	0.32	1.14			1.52	4.09	1.59
7.51	89.65	31.52	28.96							1.52	0.33	0.82			1.03	2.32	1.19
4.43	76.59	38.06	30.215							1.12	0.37	0.93			0.99	1.89	0.89
										1.01	0.35	0.82			1.16	3.14	1.22
										1.22	0.34	1.02			1.15	3.13	1.23

## Sheet: Figure 3
colon length/cm					plasma D-mannitol：ng/mL
NC	PC	FPL	FPH		NC	PC	FPL	FPH
6.3	3.2	5.5	5.5		120.533	150.438	101.676	101.391
5.2	4	5.3	5.3		114.629	149.391	102.533	100.057
5	3.7	4.8	5.5		128.819	152.914	98.2476	114.438
5	3.8	5.2	5.3		120.343	136.438	94.5333	111.2
5.7	3.2	4.5	5		118.438	151.771	96.9143	108.629
4.9	3.3	5	5		120.552	163.295	98.7809	101.771
Colon HE score
NC	PC	FPL	FPH
1	4.67	3.67	2.67
0.33	5	3.67	3
1	5	3.33	3
0.33	5.67	4	2.33
1.33	5.67	3	2
1	5.67	2.67	2.33
ZO-1 mRNA relative expression in colon					Muc-2 mRNA relative expression in colon
NC	PC	FPH			NC	PC	FPH
1.148	0.272	1.081			1.02346	0.539393	0.914921
1.343	0.348	0.856			0.850381	0.43	0.824573
1.012	0.247	0.953			1.14898	0.362362	0.723054
1.168	0.291	0.964			0.795317	0.386088	0.81
1.061	0.279	0.896			0.954536	0.429461	0.818137
1.258	0.298	1.03			0.955	0.431	0.83

## Sheet: Figure 4
		FPH/PC	Volcano plot				FPH/PC	Volcano plot		PCR heatmap
	log2(fold change)	-log10(P Value)	P Value-up	P Value-down		log2(fold change)	-log10(P Value)	P Value-up	P Value-down	Target	NC1	NC2	NC3	NC4	NC5	NC6	Target	FPL1	FPL2	FPL3	FPL4	FPL5	FPL6
LTβ	-5.68692			2.00973	MUC4	-0.0291239	0.0111587			LTβ	0.00430139	0.00788883	0.00388253	0.0017655	0.0202142	0.0274494	LTβ	0.0023504	0.000433948	0.673117	0.0190792	0.00344919	0.0032564
TNF-a	-5.82962			2.19813	occludin	0.738346		2.29254		TNF-α	0.000706352	0.00109364	0.00175404	0.000599838	0.0366534	0.00777136	TNF-α	0.0338643	0.0135538	0.357078	0.00957769	0.00163516	0.00280761
IL17	-6.58558	0.996397			cludin1	0.260304	0.250535			IL17	4.14497e-07	1.07263e-05	2.15108e-05	1.0384e-08	2.10586e-05	8.90055e-05	IL17	0.000925975	0.000124081	0.0650158	0.00110325	0.000199333	0.000149085
IL17Ra	-6.54361			1.4913	cludin2	-0.0798882	0.128644			IL17Rα	0.00200482	0.00150064	0.00189151	0.00514592	0.00166237	0.00259449	IL17Rα	0.00685171	0.00559293	0.035323	0.00162952	0.000296547	0.00146904
IL22	-6.61051	0.893329			cludin3	0.56984	0.911041			IL22	1.44322e-05	1.88808e-05	8.93418e-08	1.41448e-10	2.51567e-05	0.000311358	IL22	0.00036497	0	0.0859403	0.00653782	0.00123341	4.85676e-05
IL23	-6.48269			2.1098	Jak2	0.318586		1.34315		IL23	0.000366732	0.00041972	0.000579431	0.000231893	0.000584245	0.000881078	IL23	0.000357403	0.000269797	0.0112427	0.000458227	9.89752e-05	0.00014286
RORgt	-5.34576			2.31052	Fasl	-0.460061	0.123671			RORgt	0.0218938	0.0312936	0.0470448	0.0377824	0.0426458	0.0796738	RORgt	0.116166	0.0158814	0.277638	0.0354354	0.00587306	0.0350741
RORa	-6.42552			1.84391	Ripk2	-0.192544	0.19502			RORa	0.00581288	0.00503976	0.00623226	0.01034	0.0043721	0.0137515	RORa	0.0139836	0.00270376	0.231186	0.00598623	0.00122144	0.00462658
CD27	-5.42026			2.23094	Tirap	0.601189		1.64514		CD27	0.00147817	0.00121549	0.00241406	0.00136621	0.00285238	0.00666381	CD27	0.00106394	0.000101207	0.0986856	0.00266636	0.000479229	0.00109265
IL1β	-6.69725	1.18123			CD94	1.41411		1.99063		IL1b	0.000711922	0.00173358	0.0028194	0.000731211	0.003573	0.00400489	IL1b	0.23723	0.027914	8.21816	0.0546686	0.0101695	0.00508188
AhR	-5.93877			2.25995	Nfkb1	0.160719	0.398024			AhR	0.00984526	0.0102659	0.0191709	0.0180652	0.0168813	0.0289259	AhR	0.0155984	0.00121533	0.323939	0.016381	0.0031829	0.00890863
Id2	-6.04917			2.62578	F4/80	-5.52104	1.77179			Id2	0.0252695	0.0387317	0.0602045	0.0593646	0.0601728	0.128016	Id2	0.0470081	0.0054161	1.26024	0.0411043	0.00820209	0.0268004
NOD2	-6.01862			1.91213						NOD2	0.000902777	0.000300159	0.000791806	0.00127884	0.000922837	0.000676998	NOD2	0.000606918	5.63167e-05	0.0746577	0.00233614	0.000477649	0.000943606
TOX	-6.18883			2.18975						TOX	0.0362732	0.0210999	0.0428005	0.0654732	0.0347842	0.0719638	TOX	0.0478928	0.00480096	0.575838	0.0254828	0.00443105	0.0307218
Bcl11β	-5.45637			2.79532						Bcl11b	0.0121446	0.0113955	0.0188236	0.0125148	0.0221475	0.030048	Bcl11b	0.0114838	0.00115855	0.319356	0.0209433	0.00414559	0.0141797
GFI1	-5.50747			2.76138						GFI1	0.00143101	0.000922433	0.0018608	0.00316345	0.0019317	0.00215616	GFI1	0.00247752	0.000159225	0.0359508	0.00126275	0.000295992	0.00147598
IL13	-6.54812	1.28881								IL13	0.00064334	5.1983e-05	7.20596e-05	9.30308e-05	0.0010839	0.00017644	IL13	0.000271117	1.10041e-06	0.000857896	5.05905e-05	8.59627e-06	3.42284e-05
IL5	-6.97284			2.1628						IL5	6.65435e-05	1.31991e-05	4.91188e-05	5.41769e-05	0.000109336	8.04899e-05	IL5	2.63805e-06	0	0.00031005	1.43588e-05	6.84635e-06	2.6422e-05
IL6	-9.19642	0.814395								IL6	0.000316496	5.46966e-05	0.000161576	0.00012576	0.000898805	0.000237904	IL6	0.00172411	0.00278068	0.438563	0.0065399	0.00133531	0.000403775
IL6a	-6.1961			1.76949						IL6a	0.0058362	0.00623188	0.0103916	0.00657654	0.00811068	0.0202637	IL6a	0.0136766	0.00452534	0.269968	0.0072242	0.00141824	0.00420703
GM-CSF	-7.27273			1.5772						GM-CSF	4.76373e-05	6.8345e-05	8.96141e-05	2.74156e-05	0.000103658	0.000279877	GM-CSF	9.9837e-08	0.000501914	0.0109201	0.000390942	9.12189e-05	0.000113031
CCR6	-5.74819			1.92147						CCR6	0.000630852	0.00221523	0.00149243	0.000313316	0.00446274	0.0124136	CCR6	0.000551026	4.56607e-07	0.160482	0.00828347	0.00152228	0.00119414
IL23R	-6.21734			2.66661						IL23R	0.000201082	0.000418875	3.4273e-05	0.000401495	0.0007525	0.00121208	IL23R	0.000688579	0.000127438	0.0224816	0.00104866	0.000209458	0.000443251
TGF-β	-6.13251			1.81366						TGF-b	0.00216043	0.00281049	0.00506588	0.003663	0.00488991	0.00915999	TGF-b	0.00482855	0.00136176	0.42994	0.0115752	0.00188077	0.00386935
STAT5	-4.79799	0.697402								STAT5	0.00403481	0.0032172	0.00400416	0.00465413	0.00479695	0.00639611	STAT5	0.00580211	0.00189719	0.027078	0.00618572	0.00145838	0.00253642
IL21	-6.9766			1.40686						IL21	0.000106568	2.47595e-07	3.99309e-07	9.97856e-06	0.000109475	3.77376e-05	IL21	0.000250839	0	0.0160937	0.000155374	2.00323e-05	2.19842e-05
FOXP3	-3.72702	0.67932								FOXP3	0.000445198	0.000556913	0.000479457	0.000348205	0.000585891	0.00107343	FOXP3	0.00133186	0.000367472	0.00797327	0.00206324	0.000446611	0.000515893
IL10	-0.292218	0.124865								IL10	0.000286098	3.37195e-05	8.9277e-05	0.000151712	0.000529421	0.000103502	IL10	0.000209807	9.75149e-05	0.00315012	0.000313292	3.7885e-05	9.27014e-05
IL10rb	-2.30361			2.36952						IL10Rb	0.0441492	0.050208	0.073293	0.0697805	0.0602334	0.0693229	IL10Rb	0.0771912	0.0342735	0.284156	0.0409155	0.0224648	0.0479432
IFN-y	-4.68506			1.71983						IFN-y	0.000200903	8.33792e-05	0.000241583	8.97819e-05	0.000168202	0.00055453	IFN-y	0.00388969	3.04751e-07	0.0520843	0.00641133	0.000402963	0.000296963
IL2	-5.57556			1.56879						IL2	6.15577e-05	0.000125087	0.000127673	0.00010214	0.000240015	0.000393076	IL2	6.42121e-10	0.000430594	0.00406582	0.000102001	3.88611e-05	8.01067e-05
IL4	-3.98522	0.689827								IL4	0.00014843	0.000120576	9.12411e-05	0.000175544	0.000181601	0.000180231	IL4	0.000353872	0.000481297	0.00127093	9.6653e-05	3.72652e-05	5.98061e-05
CD80	-2.26203	1.00034								CD80	0.00165033	0.00295878	0.00252751	0.00135497	0.00371338	0.00516791	CD80	0.000971476	0.000389408	0.0327264	0.00557292	0.00142977	0.00164739
CD86	-3.16166	1.27223								CD86	0.000671817	0.000978078	0.000915535	0.000553739	0.00161332	0.00142362	CD86	0.00233505	0.000911454	0.0270368	0.00298402	0.000605532	0.000745421
IL18	-5.2795			1.41706						IL18	0.238069	0.564556	0.491941	0.336327	0.702944	1.0595	IL18	0.125443	0.0387467	0.562611	0.206847	0.0835775	0.0742625
TLr2	-2.48835			2.86968						TLr2	0.0114526	0.00971027	0.00485085	0.0127286	0.00822002	0.0122544	TLr2	0.0184993	0.0159973	0.055984	0.0102894	0.0251461	0.0406553
TLR3	0.799814	0.987464								TLR3	0.0148698	0.0134924	0.0148364	0.0183762	0.0197216	0.0139304	TLR3	0.00765872	0.00666773	0.00866362	0.00882336	0.0154475	0.0171944
TLR5	-0.489786	0.232532								TLR5	0.00663754	0.00519645	0.0048449	0.00829262	0.00593162	0.00469663	TLR5	0.00904086	0.00969919	0.00273635	0.00161861	0.00894269	0.0113477
TLR6	-0.144116	0.0924911								TLR6	0.00121932	0.00135352	0.0011559	0.00113941	0.00192075	0.00146497	TLR6	0.00300544	0.00134994	0.00349506	0.00240942	0.00113356	0.0012917
TLR7	0.443028	0.856518								TLR7	0.0029629	0.00414345	0.00307319	0.00262261	0.00565471	0.00464681	TLR7	0.00213842	0.00117546	0.00527476	0.00486709	0.00350236	0.00369254
TLR9	0.752143	0.602935								TLR9	0.0015113	0.00336269	0.00150287	0.00143537	0.00542613	0.00366286	TLR9	0.00242329	0.00075372	0.00407596	0.00375529	0.00130943	0.0015148
LBP	-0.0358164	0.0252175								LBP	0.00636893	0.00443156	0.00342892	0.00473112	0.00848506	0.00897186	LBP	0.00661662	0.00599178	0.0148829	0.00590942	0.00375624	0.00453011
IL33	-1.16513	0.475437								IL33	0.00517968	0.00380716	0.00303351	0.00414645	0.00579493	0.00522594	IL33	0.0162603	0.0199627	0.028918	0.0228705	0.00644113	0.0081355
PPAR-y	0.0127056	0.00712409								PPAR-y	0.0460201	0.0254692	0.0340254	0.0716755	0.049149	0.0545828	PPAR-y	0.0851433	0.062861	0.0361186	0.0240407	0.0777715	0.0823006
MPO	-3.11906	0.576005								MPO	2.81578e-05	1.00132e-08	1.58026e-07	4.68128e-05	5.78264e-05	1.23266e-06	MPO	0	6.75226e-10	0	1.0135e-06	1.52717e-07	5.44745e-08
CD14	0.775339	1.00696								CD14	0.0288137	0.0512206	0.0381945	0.0222939	0.0464907	0.0561571	CD14	0.11292	0.104985	0.104828	0.0741704	0.0204353	0.0251614
ZO1	0.809623		1.35474							ZO1	0.0486643	0.0612207	0.0452302	0.044692	0.0716012	0.0539597	ZO1	0.0785939	0.109743	0.0299183	0.017964	0.0165878	0.0281748
MUC2	-0.246748	0.104749								MUC2	5.0683	1.20726	1.0031	5.71718	1.35533	0.938144	MUC2	5.15497	3.16924	0.870244	0.441208	2.34894	3.17326
		FPH/PC	Volcano plot							MUC4	0.0534673	0.0140573	0.020031	0.142082	0.0139526	0.0166133	MUC4	0.0338682	0.031953	0.0190808	0.0208841	0.0810136	0.0674806
	log2(fold change)	-log10(P Value)	P Value-up	P Value-down						occludin	0.0284245	0.042963	0.0344271	0.044347	0.0288999	0.0273495	occludin	0.00867172	0.00589643	0.00313843	0.00374069	0.0118909	0.0126634
LTβ	5.73637		2.0108							cludin1	0.000869468	0.00144439	0.00155656	0.00071284	0.00153913	0.00240863	cludin1	0.00191378	0.00133392	0.00190178	0.000767898	0.000942053	0.000873241
TNF-a	5.00212		2.15535							cludin2	0.0264258	0.0547512	0.052226	0.0178695	0.0364612	0.0526105	cludin2	0.0258667	0.0251992	0.0267024	0.0242867	0.0386083	0.0450856
IL17	10.7395	1.00897								cludin3	0.192587	0.315447	0.286489	0.279334	0.239758	0.303965	cludin3	0.158091	0.192939	0.10213	0.0869844	0.218212	0.243836
IL17Ra	5.47776		1.46978							Jak2	0.00936967	0.0201438	0.0217567	0.0210567	0.0211137	0.0224933	Jak2	0.0347526	0.0382389	0.0145813	0.0139906	0.0173932	0.0189008
IL22	11.7562	0.904868								Fasl	0.000127928	0.000152169	0.000241094	0.000126228	0.000156678	0.000297945	Fasl	0.000848849	0.000712782	0.000859096	0.000357824	0.000370007	0.000455206
IL23	5.58926		2.08688							Ripk2	0.00375872	0.00204402	0.00223267	0.00425865	0.00211616	0.00332235	Ripk2	0.000713087	0.00242281	0.00293343	0.00402989	0.00179525	0.00262354
RORgt	4.39657		2.25059							Tirap	0.00598126	0.00760022	0.00517664	0.00542312	0.00614609	0.00559189	Tirap	0.00576124	0.00833477	0.00494595	0.005189	0.00388053	0.00491419
RORa	5.4853		1.82066							CD94	0.00123664	0.00146798	0.00263571	0.00150989	0.00224206	0.00374436	CD94	0.000296618	0.00127933	0.00114728	0.00229411	0.00322626	0.00366924
CD27	5.05892		2.21311							Nfkb1	0.0202009	0.0353142	0.0306695	0.0326272	0.0299984	0.037951	Nfkb1	0.0305116	0.032609	0.0265188	0.0238253	0.0237238	0.0314528
IL1β	10.1369	1.19438								F4/80	0.00315469	0.00315921	0.013175	0.00499335	0.00493506	0.0104007	F4/80	0.00318597	0.000633396	0.561592	0.0191047	0.0207554	0.0187503
AhR	5.12661		2.22878
Id2	4.75459		2.56346
NOD2	6.49569		1.92183							Target	PC1	PC2	PC3	PC4	PC5	PC6	Target	FPH1	FPH2	FPH3	FPH4	FPH5	FPH6
TOX	4.90582		2.14127							LTβ	0.00063528	0.00918636	0.424601	0.926687	1.09429	0.455226	LTβ	0.0059212	0.0134087	0.00399816	0.0204107	0.0184747	0.0055721
Bcl11β	4.9092		2.76494							TNF-α	0.00324318	0.00950662	0.226444	0.313089	0.505806	0.242492	TNF-α	0.00350555	0.00459418	0.00795108	0.00487166	0.00341572	0.00303622
GFI1	4.86484		2.72611							IL17	9.36147e-05	0.000433635	0.0241927	0.0203684	0.136749	0.0215972	IL17	0.000323512	0.000143159	0.000208134	0.00041703	0.00123304	0.000215804
IL13	3.70535	1.17656								IL17Rα	0.000384998	0.0066704	0.289288	0.0660263	0.0874259	0.100183	IL17Rα	0.000809564	0.00111044	0.00163394	0.00190599	0.000943423	0.000666333
IL5	4.36494		2.06308							IL22	1.75936e-05	9.68401e-05	0.0310058	0.307894	0.721347	0.00595497	IL22	0.00032139	0.00156437	4.26654e-05	0.000553044	0.0103431	0.000270241
IL6	11.7094	0.815858								IL23	2.4502e-05	0.000723336	0.0456972	0.018604	0.0378484	0.0200166	IL23	0.000220818	0.000234206	0.000189825	0.000525382	0.000215786	0.000262952
IL6a	5.29818		1.74449							RORgt	0.00625693	0.058016	1.65097	1.25782	0.771317	0.831189	RORgt	0.0248254	0.0227833	0.0225021	0.036917	0.00656659	0.021239
GM-CSF	8.21982		1.5831							RORa	0.00130427	0.0132317	0.294154	0.210682	0.431506	0.750752	RORa	0.00259151	0.00360745	0.00597225	0.00536142	0.00303451	0.00317062
CCR6	6.15039		1.93123							CD27	0.000137093	0.0027227	0.0928904	0.163466	0.118367	0.0667337	CD27	0.0021161	0.00232136	0.000789702	0.00404025	0.00201599	0.00116402
IL23R	6.16875		2.66484							IL1b	0.00459651	0.00835375	3.06001	0.486256	7.45022	1.73165	IL1b	0.0040085	0.00470265	0.0159191	0.00548369	0.0883866	0.0287846
TGF-β	6.59848		1.82205							AhR	0.00136601	0.0172262	0.486097	0.538927	0.931079	1.02976	AhR	0.008222	0.00982638	0.00982804	0.0157261	0.00721162	0.00793487
STAT5	4.38917	0.686564								Id2	0.015941	0.0681089	1.62879	1.79135	2.28381	2.5908	Id2	0.0221414	0.0230243	0.0298939	0.0414755	0.0169635	0.018051
IL21	7.97514		1.41379							NOD2	6.61711e-05	0.00301082	0.0538214	0.0484858	0.147904	0.113258	NOD2	0.0007984	0.000740596	0.0017838	0.001625	0.00123873	0.000596839
FOXP3	4.92131	0.719333								TOX	0.0121683	0.0634421	2.46156	0.916513	1.32123	2.04205	TOX	0.01509	0.01679	0.0329446	0.0285607	0.0076157	0.0109361
IL10	0.082048	0.0345929								Bcl11b	0.00138097	0.0241914	0.570787	0.696011	0.673685	0.716472	Bcl11b	0.0137658	0.0109002	0.0117313	0.0235627	0.00578696	0.0075304
IL10rb	1.80721		2.09882							GFI1	3.91103e-05	0.00338278	0.0618265	0.0716781	0.0588794	0.0826384	GFI1	0.00116875	0.000848514	0.00203204	0.00204615	0.000399029	0.000849726
IFN-y	6.27157		1.77827							IL13	2.95638e-05	0.000959466	0.00543723	0.0129961	0.00270598	0.000954328	IL13	0.000110823	3.91275e-05	5.76751e-05	4.55008e-05	2.3985e-05	1.85056e-05
IL2	5.02478		1.54966							IL5	0	6.36296e-05	0.00115852	0.000906235	0.00185768	0.00241638	IL5	7.79262e-06	5.66216e-06	2.10275e-05	1.83282e-05	4.25321e-08	8.31054e-06
IL4	3.35211	0.657339								IL6	0.000184187	0.00453609	0.633166	0.0229585	0.552989	3.79611	IL6	0.000209302	0.000504961	0.000221268	0.000196432	0.00842025	0.000694822
CD80	2.46888	1.04203								IL6a	0.00152558	0.0115892	0.264357	0.269707	0.482464	0.854324	IL6a	0.00409108	0.00533328	0.00499481	0.00859583	0.00462118	0.00317377
CD86	3.74946		1.34097							GM-CSF	6.30446e-05	0.000224202	0.0210063	0.0217915	0.0333152	0.0768417	GM-CSF	0.000216767	0.00020867	0.000156956	0.000194468	0.000328896	8.29405e-05
IL18	4.72029		1.39523							CCR6	0.000388586	0.00117113	0.262109	0.425664	0.465203	0.120172	CCR6	0.00173605	0.00608505	0.00135432	0.0076728	0.00911894	0.00248274
TLr2	2.66871		2.95548							IL23R	0.000203469	0.000960327	0.0402011	0.0395634	0.0564122	0.0439338	IL23R	0.000300168	0.000531076	0.000408585	0.000879636	0.000547818	0.000252998
TLR3	-0.856779		1.31012							TGF-b	0.00106119	0.0105288	0.217746	0.387582	0.702216	0.922805	TGF-b	0.00404186	0.00626979	0.00835389	0.00905604	0.00780199	0.00280553
TLR5	-0.347231	0.236162								STAT5	0.000844234	0.00849962	0.0136527	0.0200542	0.386502	0.0445669	STAT5	0.00288434	0.00355737	0.00325746	0.00415179	0.00345268	0.00311168
TLR6	0.484811	0.356122								IL21	6.45163e-08	0.000140069	0.0150725	0.00099692	0.0116198	0.0276137	IL21	2.73681e-05	8.22628e-05	1.83251e-05	7.03894e-05	0.000288333	4.15983e-05
TLR7	-0.177877	0.303153								FOXP3	0.000247897	0.0011842	0.00577541	0.00565743	0.00459565	0.0708907	FOXP3	0.0010598	0.00132084	0.000937654	0.00147518	0.00181805	0.00137262
TLR9	-0.441305	0.40068								IL10	9.23971e-06	0.000277973	0.000152817	0.000538794	5.75684e-05	2.58362e-05	IL10	8.85601e-05	7.23183e-05	7.53481e-05	9.29469e-05	0.000537638	0.00016509
LBP	0.731759	0.711989								IL10Rb	0.023758	0.0710063	0.212611	0.382409	0.207394	0.196851	IL10Rb	0.0460861	0.0390365	0.0526494	0.0508444	0.0233314	0.0481989
IL33	2.2255	0.80212								IFN-y	9.58205e-05	0.00044611	0.0293146	0.00282367	0.0286694	0.0249108	IFN-y	0.000424952	0.000169408	0.000183258	0.000463567	0.00232232	0.000455933
PPAR-y	-0.109973	0.0698192								IL2	2.05277e-05	5.17491e-05	0.00834979	0.0105757	0.0094952	4.03163e-07	IL2	5.29672e-05	0.000121812	7.8954e-05	0.000116528	0.00025282	9.33959e-05
MPO	-0.348316	0.102898								IL4	1.85685e-05	0.000320834	0.00607493	0.00122277	5.35242e-06	1.44642e-05	IL4	0.000101011	8.4327e-05	8.58079e-05	0.000105907	8.49707e-05	0.00011675
CD14	0.159393	0.19524								CD80	0.000579524	0.00137447	0.00929615	0.045463	0.0144465	0.00956894	CD80	0.00281908	0.00411489	0.00207803	0.00317238	0.00477032	0.00309659
ZO1	-1.15457			2.53269						CD86	0.000327447	0.00103586	0.00539284	0.00977802	0.0169826	0.0358069	CD86	0.00102474	0.00119343	0.000776702	0.00153903	0.00294037	0.00177808
MUC2	-0.895224	0.483192								IL18	0.103689	0.183275	8.22201	35.8382	24.6459	5.65127	IL18	0.666278	0.461897	0.225856	0.496001	0.106712	0.346212
MUC4	-0.621608	0.252922								TLr2	0.00674644	0.0306952	0.0729575	0.100316	0.0688223	0.0409891	TLr2	0.0115968	0.00639297	0.017872	0.0120831	0.00889607	0.0102613
occludin	-1.71893			4.17655						TLR3	0.011952	0.0210417	0.00487002	0.00938612	0.00450499	0.00401609	TLR3	0.0163815	0.011286	0.0156022	0.0149921	0.0100768	0.0232014
cludin1	-0.351942	0.340861								TLR5	0.00629993	0.0140094	0.00230429	0.00206495	0.00153785	0.00340401	TLR5	0.00274518	0.00167256	0.00793714	0.00201554	0.00223237	0.00332595
cludin2	-0.350532	0.513346								TLR6	0.000779737	0.00223999	0.00120512	1.5126e-05	0.00166898	0.00449618	TLR6	0.0014484	0.00119777	0.00126497	0.00146633	0.00289644	0.00217851
cludin3	-1.05302			2.49361						TLR7	0.00215053	0.00354024	0.0022523	0.00290185	0.0038642	0.00446119	TLR7	0.00366292	0.0038306	0.00318069	0.0043294	0.00713492	0.00562659
Jak2	-0.389563	1.0616								TLR9	0.000817556	0.00234318	0.00112718	0.00335971	0.0025374	0.0010052	TLR9	0.00217641	0.00301023	0.00149133	0.00361043	0.00815449	0.00252185
Fasl	1.31119	0.323165								LBP	0.00223129	0.0149305	0.00305571	0.0101752	0.0040607	0.0181755	LBP	0.015842	0.00886876	0.00275716	0.00695774	0.0130521	0.0115164
Ripk2	-0.144184	0.151095								IL33	0.00648789	0.0217146	0.00691175	0.00206607	0.0080254	0.0672397	IL33	0.00453292	0.0102222	0.00307901	0.00258563	0.0261749	0.0101043
Tirap	-0.670814			2.13124						PPAR-y	0.0516454	0.113861	0.0230445	0.0403026	0.02167	0.0180415	PPAR-y	0.0397143	0.0367703	0.0692047	0.036209	0.0188299	0.0618783
CD94	-1.16999			1.55102						MPO	3.36709e-06	1.09579e-05	2.56256e-06	7.43232e-05	0	0	MPO	1.11409e-05	8.54462e-09	4.64427e-08	0	8.73818e-07	6.30462e-08
Nfkb1	-0.353403	0.916533								CD14	0.0288719	0.0367007	0.0343436	0.0777379	0.0464813	0.0310507	CD14	0.142286	0.0582445	0.0406363	0.069076	0.0821128	0.0724738
F4/80	6.36949	1.79245								ZO1	0.025959	0.0470642	0.01316	0.0285045	0.014524	0.0185436	ZO1	0.057655	0.0354284	0.0456606	0.043121	0.0234713	0.0508385
										MUC2	2.67961	3.6186	1.58709	0.482958	0.251045	0.91073	MUC2	1.02689	0.58053	3.53924	0.852904	0.266473	0.662154
										MUC4	0.0808255	0.0719194	0.0241184	0.0128169	0.0116384	0.0204388	MUC4	0.0140069	0.011758	0.0906062	0.0174399	0.0139217	0.0180059
										occludin	0.00767441	0.00974144	0.0102719	0.0119839	0.00980892	0.0104458	occludin	0.0225046	0.0179695	0.0178345	0.0188941	0.00988787	0.0175134
										cludin1	0.000606733	0.00113007	0.00201489	0.000287022	0.00157986	0.000558409	cludin1	0.00088928	0.001426	0.000635581	0.00155329	0.0020414	0.00146045
										cludin2	0.0498645	0.041456	0.0337332	0.02745	0.01746	0.0369846	cludin2	0.0267621	0.025577	0.0442976	0.0281992	0.0243095	0.029201
										cludin3	0.1906	0.243369	0.106535	0.149019	0.0783983	0.0723482	cludin3	0.209136	0.154404	0.279682	0.189012	0.126288	0.19869
										Jak2	0.0174617	0.0182488	0.0138418	0.0130079	0.0148377	0.0138133	Jak2	0.0189276	0.0132399	0.0187205	0.0176972	0.0222338	0.0195492
										Fasl	9.98509e-05	0.000217936	1.04858e-10	2.01718e-06	0	0.00205894	Fasl	0.00017517	0.000183751	0.000176392	0.000224551	0.000834216	0.000393902
										Ripk2	0.00191094	0.00260531	0.00461729	0.00121086	0.00140609	0.00353215	Ripk2	0.00161281	0.00150457	0.00377665	0.00247575	0.00237137	0.00230011
										Tirap	0.0052241	0.0047862	0.00221553	0.00334252	0.00311814	0.00533989	Tirap	0.0063352	0.00412327	0.00689858	0.0061952	0.00464798	0.00602668
										CD94	0.00130483	0.000679653	0.000734494	0.00133708	0.000608808	0.00139405	CD94	0.00152901	0.00166523	0.00235497	0.00249357	0.00438717	0.00277333
										Nfkb1	0.0182871	0.0317257	0.0157703	0.0292361	0.0182017	0.0268868	Nfkb1	0.0257958	0.0237806	0.0319875	0.027485	0.0308153	0.0235473
										F4/80	0.00151686	0.0172373	0.290064	0.415784	0.880454	1.13996	F4/80	0.00673781	0.0081542	0.0229975	0.0184187	0.00451378	0.0108731

## Sheet: Figure 5
RORγt mRNA relative expression in colon					IL17R mRNA relative expression in colon
NC	PC	FPL	FPH		NC	PC	FPL	FPH
0.896	47.277	0.455	0.711		0.839719	52.77	0.604403	1.15
1.347	36.019	1.015	0.652		1.37138	92.86	1.51	0.661257
1.082	22.087	0.168	0.644		0.78	67.24	0.62	0.45
1.221	23.802	1.004	0.608		0.978	68.124	0.811	0.643
1.133	31.286	0.663	0.658		1.098	72.96	1.013	0.863
1.136	32.31	0.661	0.654		0.997	70.965	0.912	0.753
Id2 mRNA relative expression in colon					AHR mRNA relative expression in colon
NC	PC	FPL	FPH		NC	PC	FPL	FPH
0.838345	35.2551	0.117231	0.479248		1.34381	34.0738	1.0934	0.688797
1.30312	38.7737	0.8897	0.498359		1.26631	37.777	0.624466	0.688913
1.28494	49.43	0.18	0.647052		1.18332	65.2656	1.14825	1.10235
1.30244	56.08	0.58	0.897735		1.253	50.643	1.07	0.774
1.181	44.885	0.438	0.624		1.277	40.779	0.852	0.884
1.183	44.891	0.443	0.632		1.265	45.711	0.961	0.829
IL-17 mRNA relative expression in colon					IL22 mRNA relative expression in colon
NC	PC	FPL	FPH		NC	PC	FPL	FPH
11.4642	13170.4	67.5495	117.48		23.5397	30142.5	595.285	524.205
5.83936	11088.5	108.52	77.9351		30.7955	9712.88	50287.9	902.044
11.7104	11757.4	81.16	113.308		41.032	50572.1	6921.32	440.78
10.863	11655.7	94.236	108.338		35.762	28652.3	18348.5	745.841
9.672	12005.4	85.744	102.911		31.791	30142.6	19268.2	622.345
8.481	12355.2	77.252	97.484		27.82	31632.8	20187.8	498.849
IL23R mRNA relative expression in colon					GM-CSF mRNA relative expression in colon
NC	PC	FPL	FPH		NC	PC	FPL	FPH
0.822723	164.482	2.81731	1.22813		0.783827	345.638	6.43259	3.56669
1.71382	161.87	0.86	1.04		1.12455	358.559	8.25854	3.43347
1.64271	179.75	1.81	1.67172		1.47452	548.17	1.86	3.19979
1.576	165.686	1.735	1.285		1.073	406.343	4.354	3.265
1.394	168.702	1.831	1.314		1.129	417.458	5.52	3.408
1.212	171.823	1.928	1.343		1.185	428.561	6.686	3.551

## Sheet: Figure 6
shannon and chao indox of OTU level										LEFse Bar
Sample\Estimators	shannon	chao								taxon	mean	group	lda	pvalue	taxon	mean	group	lda	pvalue
NC1	0.829683	84.2308								p__Firmicutes.c__Clostridia	5.13483	PFH	4.66617	0.00298491	p__Actinobacteriota.c__Coriobacteriia.o__Coriobacteriales.f__Eggerthellaceae.g__Enterorhabdus	3.89687	PFH	3.64665	0.0019235
NC2	1.01886	115.833								p__Firmicutes.c__Clostridia.o__Oscillospirales.f__Oscillospiraceae.g__UCG-005	1.41147			-	p__Firmicutes.c__Bacilli.o__Lactobacillales.f__Enterococcaceae	5.00672	PC	4.5682	0.0141714
NC3	2.78027	167.8								p__Firmicutes.c__Bacilli.o__Staphylococcales.f__Staphylococcaceae.g__Jeotgalicoccus	1.11044			-	p__Firmicutes.c__Bacilli.o__Erysipelotrichales.f__Erysipelotrichaceae	4.57608			-
NC4	2.17582	139.4								p__Proteobacteria.c__Gammaproteobacteria.o__Pseudomonadales.f__Pseudomonadaceae	0.934346			-	p__Proteobacteria.c__Alphaproteobacteria.o__Rickettsiales	0.633316			-
NC5	2.47501	129.5								p__Actinobacteriota.c__Actinobacteria.o__Corynebacteriales.f__Corynebacteriaceae.g__Corynebacterium	0.633316			-	p__Firmicutes.c__Clostridia.o__Oscillospirales.f__Ruminococcaceae.g__Candidatus_Soleaferrea	0			-
NC6	1.29997	118.5								p__Firmicutes.c__Clostridia.o__Oscillospirales.f__Butyricicoccaceae.g__Butyricicoccus	0			-	p__Firmicutes.c__Bacilli.o__Lactobacillales.f__Streptococcaceae	2.57117			-
PC1	0.60186	77.1111								p__Firmicutes.c__Clostridia.o__Eubacteriales	1.96237	PFH	3.53861	0.0240187	p__Firmicutes.c__Clostridia.o__Clostridiales	4.18097	PC	3.89506	0.0019235
PC2	1.48773	97.75								p__Proteobacteria.c__Alphaproteobacteria.o__Rhizobiales	0.633316			-	p__Firmicutes.c__Clostridia.o__Monoglobales.f__Monoglobaceae.g__Monoglobus	0			-
PC3	0.957623	66.5								p__Firmicutes.c__Clostridia.o__Lachnospirales.f__Lachnospiraceae.g__Lachnospiraceae_NK4A136_group	3.95719	PFH	3.63343	0.0019235	p__Actinobacteriota	4.36614	PFH	3.99548	0.00194577
PC4	0.328252	51.2								p__Proteobacteria.c__Gammaproteobacteria.o__Pseudomonadales.f__Moraxellaceae.g__Psychrobacter	0			-	p__Firmicutes.c__Bacilli.o__Erysipelotrichales.f__Erysipelatoclostridiaceae	4.37808	PFH	4.09894	0.00298491
PC5	0.691543	40								p__Firmicutes.c__Clostridia.o__Christensenellales.f__Christensenellaceae.g__unclassified_f__Christensenellaceae	0			-	p__Firmicutes.c__Clostridia.o__Clostridiales.f__Clostridiaceae	4.18097	PC	3.89506	0.0019235
PC6	0.911013	27.2								p__Firmicutes.c__Clostridia.o__Lachnospirales.f__Lachnospiraceae.g__Lachnospiraceae_FCS020_group	1.05928			-	p__Firmicutes.c__Clostridia.o__Lachnospirales.f__Lachnospiraceae.g__Eubacterium_fissicatena_group	3.50176			-
PC7	1.03709	32								p__Firmicutes.c__Clostridia.o__Peptostreptococcales-Tissierellales.f__Anaerovoracaceae	3.32646			-	p__Cyanobacteria.c__Cyanobacteriia	0.758254			-
PC8	0.744309	74								p__Firmicutes.c__Clostridia.o__Eubacteriales.f__Anaerofustaceae	1.96237	PFH	3.54443	0.0240187	p__Bacteroidota.c__Bacteroidia.o__Bacteroidales.f__Tannerellaceae	5.37573	PFH	4.97903	0.00982327
FPL1	1.57299	99								p__Firmicutes.c__Clostridia.o__Lachnospirales.f__Lachnospiraceae	4.70446	PFH	4.31	0.0045087	p__Firmicutes.c__Clostridia.o__Oscillospirales.f__norank_o__Oscillospirales	1.58756			-
FPL2	1.51848	97.5714								p__Firmicutes.c__Clostridia.o__Monoglobales.f__Monoglobaceae	0			-	p__Firmicutes.c__Clostridia.o__Peptostreptococcales-Tissierellales.f__Anaerovoracaceae.g__Eubacterium_brachy_group	1.53641			-
FPL3	0.971254	33.25								p__Firmicutes.c__Bacilli.o__Lactobacillales.f__Lactobacillaceae	3.75389	PFH	3.39663	0.0388671	p__Firmicutes.c__Clostridia.o__Lachnospirales.f__Lachnospiraceae.g__Lachnospiraceae_UCG-010	0.758254			-
FPL4	1.50249	35.5								p__Cyanobacteria	0.758254			-	p__Verrucomicrobiota.c__Verrucomicrobiae	0.633316			-
FPL5	1.76076	68.375								p__Deferribacterota.c__Deferribacteres.o__Deferribacterales.f__Deferribacteraceae	4.35132	PFH	3.97287	0.00611816	p__Firmicutes.c__Clostridia.o__norank_c__Clostridia.f__norank_o__norank_c__Clostridia.g__norank_f__norank_o__norank_c__Clostridia	0.758254			-
FPL6	2.89368	132.125								p__Actinobacteriota.c__Coriobacteriia.o__Coriobacteriales.f__Eggerthellaceae.g__Adlercreutzia	2.62009			-	p__Proteobacteria.c__Gammaproteobacteria.o__Enterobacterales	5.89882	PC	5.30676	0.00670628
FPH1	2.44133	155.769								p__Bacteroidota.c__Bacteroidia.o__Bacteroidales.f__Prevotellaceae.g__Prevotellaceae_UCG-001	0.633316			-	p__Spirochaetota.c__Spirochaetia.o__Spirochaetales.f__Spirochaetaceae	0.758254			-
FPH2	1.44586	94.6154								p__Cyanobacteria.c__Cyanobacteriia.o__Chloroplast	0.758254			-	p__Firmicutes.c__Bacilli.o__Erysipelotrichales	4.7893	PFH	4.45065	0.00670628
FPH3	1.94179	77								p__Firmicutes.c__unclassified_p__Firmicutes.o__unclassified_p__Firmicutes	0			-	p__Proteobacteria.c__Alphaproteobacteria.o__Rhizobiales.f__Beijerinckiaceae	0.633316			-
FPH4	2.70301	154								p__Actinobacteriota.c__Acidimicrobiia.o__Microtrichales.f__Ilumatobacteraceae.g__CL500-29_marine_group	1.05928			-	p__Firmicutes.c__Clostridia.o__Clostridiales.f__Clostridiaceae.g__Clostridium_sensu_stricto_1	1.7125			-
FPH5	1.9872	124.154								p__Deferribacterota.c__Deferribacteres.o__Deferribacterales.f__Deferribacteraceae.g__Mucispirillum	4.35132	PFH	3.97287	0.00611816	p__Firmicutes.c__Clostridia.o__Lachnospirales.f__Lachnospiraceae.g__Lachnospiraceae_UCG-006	2.31456	PFH	3.24479	0.00530504
FPH6	1.20336	123.857								p__Firmicutes.c__Clostridia.o__Lachnospirales.f__Lachnospiraceae.g__Blautia	4.37178	PFH	3.93732	0.0281858	p__Firmicutes.c__Clostridia.o__Clostridia_vadinBB60_group	2.55759	PFH	3.07542	0.000600772
										p__Firmicutes.c__Clostridia.o__norank_c__Clostridia	0.758254			-	p__Desulfobacterota.c__Desulfovibrionia.o__Desulfovibrionales.f__Desulfovibrionaceae.g__Desulfovibrio	3.48006	PFH	3.16822	0.00967242
Veen										p__unclassified_k__norank_d__Bacteria.c__unclassified_k__norank_d__Bacteria	1.45722			-	p__Firmicutes.c__Clostridia.o__Lachnospirales.f__Lachnospiraceae.g__unclassified_f__Lachnospiraceae	3.74458	PFH	3.42499	0.00185764
Group_lable	Species_num									p__Firmicutes.c__Clostridia.o__Oscillospirales.f__Oscillospiraceae.g__Oscillibacter	3.00377	PFH	3.31212	0.00285974	p__Proteobacteria.c__Gammaproteobacteria.o__Enterobacterales.f__Enterobacteriaceae	5.8988	PC	5.30689	0.00670628
NC & PC & PFH & PFL	67									p__Proteobacteria.c__Gammaproteobacteria	5.89883	PC	5.30678	0.00670628	p__Deferribacterota	4.35132	PFH	3.97287	0.00611816
NC & PC & PFH	4									p__Spirochaetota.c__Spirochaetia.o__Spirochaetales.f__Spirochaetaceae.g__Sphaerochaeta	0.758254			-	p__Firmicutes.c__Clostridia.o__Peptostreptococcales-Tissierellales.f__Peptostreptococcaceae.g__Romboutsia	4.39414	PFH	4.00673	0.0388671
NC & PC & PFL	6									p__Firmicutes.c__Clostridia.o__Oscillospirales.f__Ruminococcaceae.g__Harryflintia	0			-	p__Proteobacteria.c__Alphaproteobacteria.o__Rhizobiales.f__Beijerinckiaceae.g__Methylobacterium-Methylorubrum	0.633316			-
NC & PFH & PFL	38									p__Firmicutes.c__Clostridia.o__Lachnospirales.f__Lachnospiraceae.g__Frisingicoccus	3.08047			-	p__Firmicutes.c__Bacilli.o__RF39.f__norank_o__RF39.g__norank_f__norank_o__RF39	1.05928			-
PC & PFH & PFL	8									p__Firmicutes.c__unclassified_p__Firmicutes.o__unclassified_p__Firmicutes.f__unclassified_p__Firmicutes	0			-	p__Firmicutes.c__Clostridia.o__Oscillospirales.f__Ruminococcaceae.g__norank_f__Ruminococcaceae	3.74278	PFH	3.42379	0.00173026
NC & PC	7									p__Firmicutes.c__Bacilli.o__Staphylococcales.f__Staphylococcaceae.g__Staphylococcus	3.78109	PFH	3.46233	0.0453308	p__Spirochaetota	0.758254			-
NC & PFH	12									p__Proteobacteria.c__Gammaproteobacteria.o__Burkholderiales	0			-	p__Firmicutes.c__Clostridia.o__Clostridia_vadinBB60_group.f__norank_o__Clostridia_vadinBB60_group.g__norank_f__norank_o__Clostridia_vadinBB60_group	2.55759	PFH	3.07571	0.000600772
NC & PFL	8									p__unclassified_k__norank_d__Bacteria	1.45722			-	p__unclassified_k__norank_d__Bacteria.c__unclassified_k__norank_d__Bacteria.o__unclassified_k__norank_d__Bacteria.f__unclassified_k__norank_d__Bacteria	1.45722			-
PC & PFH	4									p__Actinobacteriota.c__Coriobacteriia.o__Coriobacteriales.f__Eggerthellaceae.g__norank_f__Eggerthellaceae	0			-	p__Firmicutes.c__Bacilli.o__Lactobacillales.f__Aerococcaceae.g__Aerococcus	0			-
PC & PFL	4									p__Proteobacteria.c__Gammaproteobacteria.o__Pseudomonadales	1.23538			-	p__Firmicutes.c__Clostridia.o__Lachnospirales.f__Lachnospiraceae.g__Roseburia	0			-
PFH & PFL	14									p__Proteobacteria.c__Gammaproteobacteria.o__Enterobacterales.f__Hafniaceae	2.28973			-	p__Deferribacterota.c__Deferribacteres.o__Deferribacterales	4.35132	PFH	3.97287	0.00611816
NC only	37									p__Firmicutes.c__Bacilli.o__Lactobacillales.f__Aerococcaceae	0			-	p__Bacteroidota.c__Bacteroidia	5.49871	PFH	5.13941	0.00982327
PC only	7									p__Actinobacteriota.c__Coriobacteriia.o__Coriobacteriales.f__Eggerthellaceae	3.90993	PFH	3.61784	0.00982327	p__Firmicutes.c__Clostridia.o__Oscillospirales.f__Eubacterium_coprostanoligenes_group.g__norank_f__Eubacterium_coprostanoligenes_group	3.71201			-
PFH only	32									p__Firmicutes.c__Clostridia.o__Lachnospirales.f__Lachnospiraceae.g__Acetatifactor	2.2634	PFH	3.10379	0.0351718	p__Actinobacteriota.c__Actinobacteria.o__Corynebacteriales	0.633316			-
PFL only	10									p__Proteobacteria.c__Alphaproteobacteria.o__Rickettsiales.f__Mitochondria	0.633316			-	p__Firmicutes.c__Clostridia.o__Clostridia_UCG-014.f__norank_o__Clostridia_UCG-014	1.79965			-
										p__Actinobacteriota.c__Acidimicrobiia.o__Microtrichales.f__Ilumatobacteraceae	1.05928			-	p__Firmicutes.c__Clostridia.o__Monoglobales	0			-
										p__Actinobacteriota.c__Acidimicrobiia	1.05928			-	p__Proteobacteria.c__Gammaproteobacteria.o__Burkholderiales.f__Alcaligenaceae.g__Paenalcaligenes	0			-
										p__Spirochaetota.c__Spirochaetia	0.758254			-	p__Firmicutes.c__Clostridia.o__Peptostreptococcales-Tissierellales.f__Anaerovoracaceae.g__Eubacterium_nodatum_group	1.90438	PFH	3.29691	0.0311113
										p__Firmicutes.c__Clostridia.o__Oscillospirales.f__Oscillospiraceae.g__norank_f__Oscillospiraceae	2.96777	PFH	3.09789	0.0195919	p__Firmicutes.c__Clostridia.o__Peptococcales	2.20541			-
										p__Firmicutes.c__Bacilli.o__Bacillales	0			-	p__Firmicutes.c__Clostridia.o__Clostridia_UCG-014	1.79965			-
										p__Firmicutes.c__Clostridia.o__Lachnospirales.f__Lachnospiraceae.g__GCA-900066575	3.07001	PFH	2.90473	0.0015201	p__Firmicutes.c__Clostridia.o__Peptococcales.f__Peptococcaceae.g__norank_f__Peptococcaceae	2.20541			-
										p__Firmicutes.c__Clostridia.o__Lachnospirales.f__Lachnospiraceae.g__Eubacterium_xylanophilum_group	0			-	p__Bacteroidota	5.49871	PFH	5.13941	0.00982327
										p__Firmicutes.c__Clostridia.o__Lachnospirales.f__Lachnospiraceae.g__Anaerostipes	2.32646	PFH	3.524	0.0130827	p__Firmicutes.c__Bacilli.o__RF39	1.05928			-
PCOA on Phylum level										taxon	mean	group	lda	pvalue	taxon	mean	group	lda	pvalue
	PC1	PC2	PC3	PC4	PC5	PC6	PC7	PC8	PC9	p__Firmicutes.c__Clostridia.o__Peptococcales.f__Peptococcaceae	2.20541			-	p__Desulfobacterota.c__Desulfovibrionia.o__Desulfovibrionales	3.48006	PFH	3.16822	0.00967242
NC1	-0.557624	0.190427	0.0870753	0.00552843	0.00595144	-0.0310527	0.037988	-0.0242343	-0.0123687	p__Verrucomicrobiota.c__Verrucomicrobiae.o__Verrucomicrobiales.f__Akkermansiaceae.g__Akkermansia	0.633316			-	p__Firmicutes.c__Bacilli.o__Erysipelotrichales.f__Erysipelatoclostridiaceae.g__norank_f__Erysipelatoclostridiaceae	1.7125			-
NC2	-0.551443	0.199107	0.130976	-0.0182773	0.000889737	0.0153759	0.0251338	-0.0277526	0.0158721	p__Firmicutes.c__Clostridia.o__Oscillospirales.f__Eubacterium_coprostanoligenes_group	3.71201			-	p__Bacteroidota.c__Bacteroidia.o__Bacteroidales.f__Muribaculaceae	4.89064			-
NC3	-0.477765	-0.126781	-0.0982668	-0.0527165	-0.0304907	-0.0566791	-0.0471397	-0.0607519	0.000671588	p__Proteobacteria.c__Alphaproteobacteria	0.934346			-	p__Actinobacteriota.c__Acidimicrobiia.o__Microtrichales	1.05928			-
NC4	-0.548786	0.161508	-0.00147274	0.00510656	-0.00620126	-0.0633675	-0.0666978	0.0369993	0.0100579	p__Firmicutes.c__Clostridia.o__Clostridia_UCG-014.f__norank_o__Clostridia_UCG-014.g__norank_f__norank_o__Clostridia_UCG-014	1.79965			-	p__Firmicutes.c__Clostridia.o__Oscillospirales.f__Ruminococcaceae.g__Paludicola	3.39172			-
NC5	-0.45113	-0.105143	-0.249794	0.0643319	0.00411705	0.0412053	0.0305523	0.00747219	0.00291414	p__Firmicutes.c__unclassified_p__Firmicutes	0			-	p__Firmicutes.c__Bacilli.o__Erysipelotrichales.f__Erysipelotrichaceae.g__Turicibacter	3.24681	PFH	3.24961	0.00367552
NC6	-0.557626	0.167178	-0.0585184	0.0746219	-0.026368	0.0638992	-0.00875423	0.0128028	-0.0201447	p__Firmicutes.c__Bacilli.o__Erysipelotrichales.f__Erysipelatoclostridiaceae.g__Candidatus_Stoquefichus	1.23538			-	p__Firmicutes.c__Clostridia.o__Lachnospirales.f__Lachnospiraceae.g__norank_f__Lachnospiraceae	3.16987	PFH	3.11836	0.00126015
PC1	0.368626	0.167585	0.00582574	0.00984069	-0.0542281	-0.00231275	-0.0293112	0.0179781	0.000702438	p__Firmicutes.c__Clostridia.o__Oscillospirales.f__Oscillospiraceae.g__NK4A214_group	0			-	p__Firmicutes.c__Bacilli.o__Erysipelotrichales.f__Erysipelotrichaceae.g__Faecalibaculum	4.55197			-
PC2	0.186747	-0.0571227	-0.0640346	-0.0526461	0.0346148	0.0393256	0.00247455	-0.0218779	0.0166958	p__Firmicutes.c__Bacilli.o__Staphylococcales.f__Staphylococcaceae	3.78109	PFH	3.46136	0.0453308	p__Bacteroidota.c__Bacteroidia.o__Bacteroidales.f__unclassified_o__Bacteroidales.g__unclassified_o__Bacteroidales	1.23538			-
PC3	0.270599	0.115392	0.0176333	0.0147116	0.00404203	-0.0102139	-0.027079	0.00616777	-0.022636	p__Firmicutes.c__Bacilli.o__Erysipelotrichales.f__Erysipelotrichaceae.g__Faecalitalea	2.56781			-	p__Firmicutes.c__Clostridia.o__Oscillospirales.f__Ruminococcaceae.g__unclassified_f__Ruminococcaceae	0.758254			-
PC4	0.391785	0.198187	0.0253235	0.0163608	-0.0544243	0.012922	0.0248587	-0.035365	-0.0094992	p__Bacteroidota.c__Bacteroidia.o__Bacteroidales.f__Bacteroidaceae.g__Bacteroides	3.08047			-	p__Firmicutes.c__Bacilli.o__Acholeplasmatales.f__Acholeplasmataceae.g__Anaeroplasma	3.44578	PFH	3.17191	0.000600772
PC5	0.251745	0.1478	0.0392135	0.0546374	0.0486547	0.00658897	0.0194002	-0.0490821	-0.00215558	p__Firmicutes.c__Clostridia.o__Lachnospirales.f__Lachnospiraceae.g__Marvinbryantia	1.93435			-	p__Firmicutes.c__Bacilli.o__RF39.f__norank_o__RF39	1.05928			-
PC6	0.147571	0.11609	0.000384893	0.0206261	-0.00475198	-0.00191289	0.0180622	0.0171942	0.0483224	p__Firmicutes.c__Bacilli.o__Lactobacillales.f__Carnobacteriaceae.g__Atopostipes	0.758254			-	p__Proteobacteria.c__Alphaproteobacteria.o__Rickettsiales.f__Mitochondria.g__norank_f__Mitochondria	0.633316			-
PC7	0.256814	0.00487577	-0.0578705	-0.0565806	0.0096245	0.0308152	0.00914835	0.0124696	-0.00555691	p__Proteobacteria.c__Gammaproteobacteria.o__Pseudomonadales.f__Moraxellaceae	0.934346			-	p__unclassified_k__norank_d__Bacteria.c__unclassified_k__norank_d__Bacteria.o__unclassified_k__norank_d__Bacteria	1.45722			-
PC8	0.331019	0.136276	0.00202862	0.00539223	-0.0450399	-0.000661985	-0.0207904	0.0160158	0.000746501	p__Firmicutes.c__Bacilli.o__Lactobacillales.f__Lactobacillaceae.g__Lactobacillus	3.75389	PFH	3.39663	0.0388671	p__Verrucomicrobiota	0.633316			-
FPL1	-0.0175325	-0.339349	0.107584	0.0643484	0.0725912	0.0425651	-0.0420087	0.000483888	0.0113777	p__Firmicutes.c__Bacilli.o__Bacillales.f__Planococcaceae	0			-	p__Desulfobacterota	3.48006	PFH	3.16822	0.00967242
FPL2	0.201197	-0.235767	0.0388989	0.0024446	-0.0806885	-0.0170365	0.0132538	0.0159591	-0.0197013	p__Firmicutes.c__Clostridia.o__Oscillospirales.f__Ruminococcaceae.g__Anaerotruncus	2.85168			-	p__Firmicutes.c__Clostridia.o__Clostridia_vadinBB60_group.f__norank_o__Clostridia_vadinBB60_group	2.55759	PFH	3.07536	0.000600772
FPL3	0.0983829	-0.0462508	-0.0537294	-6.4783e-05	0.0584442	-0.114295	0.059607	0.0392406	-0.0024538	p__Bacteroidota.c__Bacteroidia.o__Bacteroidales.f__Prevotellaceae	0.633316			-	p__Actinobacteriota.c__Coriobacteriia.o__Coriobacteriales	4.36592	PFH	3.99538	0.00194577
FPL4	-0.276455	-0.286358	0.0772039	0.024195	-0.071375	0.00560385	0.0356447	0.0178412	0.00962073	p__Firmicutes.c__Clostridia.o__norank_c__Clostridia.f__norank_o__norank_c__Clostridia	0.758254			-	p__Firmicutes.c__Bacilli.o__Acholeplasmatales	3.44578	PFH	3.17191	0.000600772
FPL5	0.0119094	-0.299484	0.069637	0.0686516	0.0409118	-0.0232608	-0.00745795	-0.0130047	-0.0214169	p__Bacteroidota.c__Bacteroidia.o__Bacteroidales.f__Muribaculaceae.g__Muribaculum	4.15724	PFH	3.90559	0.00982327	p__Firmicutes.c__Clostridia.o__Lachnospirales	4.70446	PFH	4.31	0.0045087
FPL6	0.241049	0.0404618	-0.0277636	-0.018917	0.020552	0.00701672	-0.00424962	0.00837862	-0.0142571	p__Desulfobacterota.c__Desulfovibrionia	3.48006	PFH	3.16822	0.00967242	p__Firmicutes.c__unclassified_p__Firmicutes.o__unclassified_p__Firmicutes.f__unclassified_p__Firmicutes.g__unclassified_p__Firmicutes	0			-
FPH1	0.18727	-0.111951	-0.0519733	-0.0785926	0.00874275	-0.0164531	-0.00612917	-0.0487208	0.00281163	p__Firmicutes.c__Clostridia.o__Peptostreptococcales-Tissierellales	4.4298			-	p__Firmicutes.c__Clostridia.o__Oscillospirales.f__Ruminococcaceae	3.99302	PFH	3.57085	0.00670628
FPH2	0.22193	-0.20489	0.020008	-0.0132	-0.0737874	0.00468623	0.000554303	-0.00269854	0.0185148	p__Bacteroidota.c__Bacteroidia.o__Bacteroidales.f__unclassified_o__Bacteroidales	1.23538			-	p__Firmicutes.c__Clostridia.o__Lachnospirales.f__Lachnospiraceae.g__Eisenbergiella	1.75825	PFH	3.56411	0.0311113
FPH3	0.198896	0.0973215	0.0096487	0.0306964	0.0415587	-0.00676432	-0.014047	0.0158261	0.0135361	p__Firmicutes.c__Clostridia.o__Oscillospirales.f__Oscillospiraceae	4.63447	PFH	4.24796	0.00298491	p__Firmicutes.c__Clostridia.o__Oscillospirales.f__Ruminococcaceae.g__UBA1819	3.05272			-
FPH4	0.222952	0.0727935	-0.00618099	0.0152161	0.0431988	0.00651597	-0.0143773	0.00375498	0.000512697	p__Actinobacteriota.c__Coriobacteriia	4.36592	PFH	3.99538	0.00194577	p__Firmicutes.c__Bacilli.o__Acholeplasmatales.f__Acholeplasmataceae	3.44578	PFH	3.17191	0.000600772
FPH5	0.249671	0.0306782	-0.0405802	-0.0338916	0.0191479	0.0156097	0.00462144	0.0117402	-0.0103299	p__Firmicutes.c__Clostridia.o__Peptostreptococcales-Tissierellales.f__Anaerovoracaceae.g__unclassified_f__Anaerovoracaceae	0			-	p__Desulfobacterota.c__Desulfovibrionia.o__Desulfovibrionales.f__Desulfovibrionaceae	3.48006	PFH	3.16822	0.00967242
FPH6	-0.399801	-0.0325846	0.0787435	-0.151823	0.0343133	0.0518802	0.00674266	0.0431635	-0.0118365	p__Firmicutes.c__Bacilli.o__Staphylococcales	3.78109	PFH	3.46136	0.0453308	p__Firmicutes.c__Clostridia.o__Oscillospirales.f__Butyricicoccaceae.g__UCG-009	1.75825			-
PCOA on Phylum level										p__Actinobacteriota.c__Actinobacteria.o__Corynebacteriales.f__Corynebacteriaceae	0.633316			-	p__Deferribacterota.c__Deferribacteres	4.35132	PFH	3.97287	0.00611816
	PC10	PC11	PC12	PC13	PC14	PC15				p__Firmicutes.c__Clostridia.o__Oscillospirales.f__Oscillospiraceae.g__Colidextribacter	4.1792	PFH	3.82955	0.00185764	p__Cyanobacteria.c__Cyanobacteriia.o__Chloroplast.f__norank_o__Chloroplast	0.758254			-
NC1	-0.0193233	-0.00390904	0.000871415	0.00333947	-0.00037082	-2.0121e-09				p__Cyanobacteria.c__Cyanobacteriia.o__Chloroplast.f__norank_o__Chloroplast.g__norank_f__norank_o__Chloroplast	0.758254			-	p__Firmicutes.c__Clostridia.o__Christensenellales	0			-
NC2	0.00446189	0.00810755	-0.00242005	-0.00444168	0.000383711	-2.0121e-09				p__Spirochaetota.c__Spirochaetia.o__Spirochaetales	0.758254			-	p__Actinobacteriota.c__Coriobacteriia.o__Coriobacteriales.f__Atopobiaceae	4.17887	PFH	3.81085	0.0045087
NC3	-0.00568814	0.00643514	-0.000319758	1.02704e-05	-7.15325e-05	-2.0121e-09				p__Firmicutes.c__Clostridia.o__Peptostreptococcales-Tissierellales.f__Anaerovoracaceae.g__Family_XIII_AD3011_group	3.30232			-	p__Bacteroidota.c__Bacteroidia.o__Bacteroidales.f__Tannerellaceae.g__Parabacteroides	5.37573	PFH	4.97903	0.00982327
NC4	-0.00879893	-0.00425322	-0.000407845	-0.000868745	0.000219613	-2.0121e-09				p__Actinobacteriota.c__Actinobacteria	0.633316			-	p__Firmicutes.c__Clostridia.o__Oscillospirales.f__Oscillospiraceae.g__unclassified_f__Oscillospiraceae	2.85516	PFH	3.0454	0.00199798
NC5	-0.00527689	-0.000303494	-0.000795158	-0.00106292	0.000144075	-2.0121e-09				p__Firmicutes.c__Clostridia.o__Lachnospirales.f__Lachnospiraceae.g__Lachnoclostridium	3.56034	PFH	3.24462	0.00311494	p__Firmicutes.c__Bacilli.o__Lactobacillales.f__Enterococcaceae.g__Enterococcus	5.00672	PC	4.5682	0.0141714
NC6	0.0206912	0.00186155	0.00190588	0.00171564	-0.000343267	-2.0121e-09				p__Firmicutes.c__Bacilli.o__Erysipelotrichales.f__Erysipelotrichaceae.g__norank_f__Erysipelotrichaceae	2.43035			-	p__Proteobacteria.c__Gammaproteobacteria.o__Burkholderiales.f__Alcaligenaceae	0			-
PC1	-0.00596215	-0.00982766	-0.00709335	0.000145078	0.000141287	-2.0121e-09				p__Firmicutes.c__Clostridia.o__Oscillospirales.f__norank_o__Oscillospirales.g__norank_f__norank_o__Oscillospirales	1.58756			-	p__Firmicutes.c__Clostridia.o__Oscillospirales.f__Oscillospiraceae.g__Flavonifractor	4.40368	PFH	3.99413	0.00670628
PC2	-0.0202078	-0.012283	0.00200787	-0.00486902	0.00132842	-2.0121e-09				p__Firmicutes.c__Clostridia.o__Eubacteriales.f__Anaerofustaceae.g__Anaerofustis	1.96237	PFH	3.53732	0.0240187	p__Actinobacteriota.c__Coriobacteriia.o__Coriobacteriales.f__Eggerthellaceae.g__Parvibacter	1.36031			-
PC3	0.0304396	-0.0101901	0.00327245	-0.000406476	0.00130941	-2.0121e-09				p__Firmicutes.c__Clostridia.o__Peptostreptococcales-Tissierellales.f__Peptostreptococcaceae	4.39414	PFH	4.00673	0.0388671	p__Firmicutes.c__Bacilli.o__Lactobacillales	5.01271	PC	4.53894	0.0141714
PC4	-0.00981137	0.0103859	-0.00113936	0.00221754	-0.000538345	-2.0121e-09				p__Actinobacteriota.c__Coriobacteriia.o__Coriobacteriales.f__Atopobiaceae.g__Coriobacteriaceae_UCG-002	4.17887	PFH	3.81085	0.0045087	p__Firmicutes.c__Clostridia.o__Lachnospirales.f__Lachnospiraceae.g__Tuzzerella	1.96237	PFH	3.84395	0.0240187
PC5	0.00129728	-0.00544771	0.00145544	-0.00205938	0.000566631	-2.0121e-09				p__Bacteroidota.c__Bacteroidia.o__Bacteroidales.f__Bacteroidaceae	3.08047			-	p__Firmicutes.c__Bacilli.o__Lactobacillales.f__Carnobacteriaceae	0.758254			-
PC6	0.018843	-0.0100839	-0.000243683	-0.000366615	0.000491235	-2.0121e-09				p__Firmicutes.c__Bacilli.o__Lactobacillales.f__Streptococcaceae.g__Streptococcus	2.57117			-	p__Bacteroidota.c__Bacteroidia.o__Bacteroidales	5.49871	PFH	5.13941	0.00982327
PC7	-0.0166417	0.00522758	0.00217556	0.00618932	0.0027725	-2.0121e-09				p__Proteobacteria.c__Gammaproteobacteria.o__Enterobacterales.f__Enterobacteriaceae.g__Escherichia-Shigella	5.89142	PC	5.2929	0.00670628	p__Proteobacteria.c__Gammaproteobacteria.o__Pseudomonadales.f__Pseudomonadaceae.g__Pseudomonas	0.934346			-
PC8	-0.0113214	0.00663238	0.0101879	-0.00387142	1.99538e-05	-2.0121e-09				p__Firmicutes.c__Clostridia.o__Clostridiales.f__Clostridiaceae.g__Clostridium_sensu_stricto_13	4.17949	PC	3.89462	0.00153063	p__Bacteroidota.c__Bacteroidia.o__Bacteroidales.f__Muribaculaceae.g__norank_f__Muribaculaceae	4.80193			-
FPL1	-0.00240004	0.0181725	-0.000416812	-0.00142705	-0.000189502	-2.0121e-09				p__Firmicutes.c__Clostridia.o__Lachnospirales.f__Lachnospiraceae.g__A2	0			-	p__Proteobacteria.c__Gammaproteobacteria.o__Pseudomonadales.f__Moraxellaceae.g__Acinetobacter	0.934346			-
FPL2	-0.00190465	0.0109696	0.000866059	-0.00601097	0.00136764	-2.0121e-09				p__Firmicutes.c__Clostridia.o__Lachnospirales.f__Lachnospiraceae.g__ASF356	1.7125			-	p__Firmicutes.c__Bacilli.o__Bacillales.f__Planococcaceae.g__Sporosarcina	0			-
FPL3	0.00412825	0.00670672	0.000741591	-0.000889197	-8.21631e-05	-2.0121e-09				p__Proteobacteria	5.89884	PC	5.30679	0.00670628	p__Firmicutes.c__Clostridia.o__Oscillospirales	4.76455	PFH	4.37181	0.00298491
FPL4	0.00909612	-0.00491436	-0.000497499	0.000627102	4.44354e-05	-2.0121e-09				p__Firmicutes.c__Clostridia.o__Oscillospirales.f__Butyricicoccaceae	1.75825			-	p__Proteobacteria.c__Gammaproteobacteria.o__Enterobacterales.f__Hafniaceae.g__Hafnia-Obesumbacterium	2.28973			-
FPL5	-0.00691098	-0.0207477	0.00027618	0.00238465	0.000149247	-2.0121e-09				p__Verrucomicrobiota.c__Verrucomicrobiae.o__Verrucomicrobiales	0.633316			-	p__Firmicutes.c__Bacilli	5.03873			-
FPL6	0.00254242	0.0061051	-0.0139176	-0.00183308	0.000758828	-2.0121e-09				p__Proteobacteria.c__Gammaproteobacteria.o__Enterobacterales.f__Enterobacteriaceae.g__Enterobacter	4.12552	PC	3.83832	0.0045087
FPH1	0.0378461	0.00165037	0.00133596	0.00181157	-0.000283691	-2.0121e-09				p__Firmicutes.c__Clostridia.o__Christensenellales.f__Christensenellaceae	0			-
FPH2	-0.00698978	-0.00673995	-0.000795455	0.00549253	-0.00172111	-2.0121e-09				p__Firmicutes	5.36308			-
FPH3	0.000756141	0.0212326	0.00114939	0.00654822	-2.04287e-05	-2.0121e-09				p__Firmicutes.c__Bacilli.o__Erysipelotrichales.f__Erysipelatoclostridiaceae.g__Erysipelatoclostridium	4.37683	PFH	4.09793	0.00298491
FPH4	-0.0104307	-0.0121653	3.6498e-06	-0.00019746	-0.00115756	-2.0121e-09				p__Firmicutes.c__Clostridia.o__Lachnospirales.f__Lachnospiraceae.g__Ruminococcus_torques_group	2.95965			-
FPH5	-0.00158079	0.00208714	0.000605054	-0.00315449	-0.00481101	-2.0121e-09				pearson correlation analysis between the top 20 genera of microorganisms in the intestine and mRNA expression of barrier and ILC3 immune cell related genes in colon.
FPH6	0.00314677	-0.00470869	0.0011922	0.000977128	-0.000107564	-2.0121e-09				name	IL10	IL4	IL6	FOXP3	TLr2	IL22	IL18	IFNy
										g__Escherichia-Shigella	0.21583	0.45355	0.32778	0.2981	0.6016	0.33062	0.42461	0.50801
Percent of community abundance on Genus level										g__Faecalibaculum	-0.0769	-0.14149	-0.15937	-0.15344	-0.3212	-0.17161	-0.17486	-0.25596
OTU ID	NC	PC	FPH	FPL	OTU ID	NC	PC	FPH	FPL	g__Parabacteroides	-0.12086	-0.25538	-0.04319	-0.00986	-0.4137	-0.23975	-0.3029	-0.24211
d__Bacteria; k__norank_d__Bacteria; p__Proteobacteria; c__Gammaproteobacteria; o__Enterobacterales; f__Enterobacteriaceae; g__Escherichia-Shigella	0.166667	22647	11765	11530.7	d__Bacteria; k__norank_d__Bacteria; p__Firmicutes; c__Bacilli; o__Erysipelotrichales; f__Erysipelotrichaceae; g__norank_f__Erysipelotrichaceae	1.33333	0.375	7.83333	15.3333	g__Enterococcus	0.35659	0.10438	0.28416	0.24557	0.71973	0.8011	0.68051	0.63791
d__Bacteria; k__norank_d__Bacteria; p__Firmicutes; c__Bacilli; o__Erysipelotrichales; f__Erysipelotrichaceae; g__Faecalibaculum	14860	118.375	1036.5	179.167	d__Bacteria; k__norank_d__Bacteria; p__Firmicutes; c__Bacilli; o__Erysipelotrichales; f__Erysipelotrichaceae; g__Faecalitalea	0	10.75	0	9.83333	g__Enterobacter	-0.07103	-0.10883	-0.07131	-0.05562	-0.09923	-0.09528	-0.12193	-0.06558
d__Bacteria; k__norank_d__Bacteria; p__Bacteroidota; c__Bacteroidia; o__Bacteroidales; f__Tannerellaceae; g__Parabacteroides	1123.83	1389.25	6907.5	3371.67	d__Bacteria; k__norank_d__Bacteria; p__Firmicutes; c__Clostridia; o__Christensenellales; f__Christensenellaceae; g__unclassified_f__Christensenellaceae	19.3333	0	0	0	g__Akkermansia	-0.10374	-0.12997	-0.13804	-0.13962	-0.30986	-0.14762	-0.16021	-0.22232
d__Bacteria; k__norank_d__Bacteria; p__Firmicutes; c__Bacilli; o__Lactobacillales; f__Enterococcaceae; g__Enterococcus	2.33333	2953.38	519.333	2098	d__Bacteria; k__norank_d__Bacteria; p__Firmicutes; c__Clostridia; o__Peptostreptococcales-Tissierellales; f__Anaerovoracaceae; g__Eubacterium_nodatum_group	11.8333	0	2.33333	0.5	g__norank_f__Muribaculaceae	-0.1734	-0.16252	-0.16788	-0.1564	-0.2406	-0.17501	-0.19936	-0.25898
d__Bacteria; k__norank_d__Bacteria; p__Proteobacteria; c__Gammaproteobacteria; o__Enterobacterales; f__Enterobacteriaceae; g__Enterobacter	4	388.25	13.6667	4601.83	d__Bacteria; k__norank_d__Bacteria; p__Firmicutes; c__Clostridia; o__Lachnospirales; f__Lachnospiraceae; g__A2	12.6667	0	0	0	g__Blautia	-0.07052	-0.16632	-0.13521	-0.13001	-0.26203	-0.15727	-0.19771	-0.20195
d__Bacteria; k__norank_d__Bacteria; p__Verrucomicrobiota; c__Verrucomicrobiae; o__Verrucomicrobiales; f__Akkermansiaceae; g__Akkermansia	4526.17	0.125	0	0	d__Bacteria; k__norank_d__Bacteria; p__Firmicutes; c__Clostridia; o__Oscillospirales; f__Oscillospiraceae; g__NK4A214_group	11.8333	0	0	0	g__Romboutsia	-0.16423	-0.20606	-0.07299	-0.03598	-0.17681	-0.18236	-0.09419	-0.31351
d__Bacteria; k__norank_d__Bacteria; p__Bacteroidota; c__Bacteroidia; o__Bacteroidales; f__Muribaculaceae; g__norank_f__Muribaculaceae	883.5	162.625	1843	990.833	d__Bacteria; k__norank_d__Bacteria; p__Firmicutes; c__Clostridia; o__Lachnospirales; f__Lachnospiraceae; g__Lachnospiraceae_UCG-006	2.66667	0.125	6	2	g__Coriobacteriaceae_UCG-002	-0.18059	-0.1946	-0.19832	-0.18997	-0.38732	-0.21377	-0.23458	-0.32142
d__Bacteria; k__norank_d__Bacteria; p__Firmicutes; c__Clostridia; o__Lachnospirales; f__Lachnospiraceae; g__Blautia	1787	176.25	684.5	332.667	d__Bacteria; k__norank_d__Bacteria; p__Firmicutes; c__Clostridia; o__Lachnospirales; f__Lachnospiraceae; g__Acetatifactor	0	0.125	5.33333	4.66667	g__Lactobacillus	-0.06465	-0.07635	-0.06747	-0.06574	0.12588	-0.06963	-0.08092	-0.10125
d__Bacteria; k__norank_d__Bacteria; p__Firmicutes; c__Clostridia; o__Peptostreptococcales-Tissierellales; f__Peptostreptococcaceae; g__Romboutsia	744.667	152.625	720.667	245	d__Bacteria; k__norank_d__Bacteria; p__Firmicutes; c__Clostridia; o__Oscillospirales; f__Oscillospiraceae; g__UCG-005	1.83333	0.75	0.166667	7.16667	g__Lachnospiraceae_NK4A136_group	-0.11994	-0.13011	-0.1214	-0.11752	0.00662	-0.12882	-0.1511	-0.1905
d__Bacteria; k__norank_d__Bacteria; p__Actinobacteriota; c__Coriobacteriia; o__Coriobacteriales; f__Atopobiaceae; g__Coriobacteriaceae_UCG-002	1197.83	29.875	439	66.8333	d__Bacteria; k__norank_d__Bacteria; p__Firmicutes; c__Bacilli; o__Bacillales; f__Planococcaceae; g__Sporosarcina	9.66667	0	0	0	g__Clostridium_sensu_stricto_13	0.23039	-0.07995	-0.02532	-0.01628	-0.06179	-0.03093	-0.12014	0.19201
d__Bacteria; k__norank_d__Bacteria; p__Firmicutes; c__Bacilli; o__Lactobacillales; f__Lactobacillaceae; g__Lactobacillus	55.6667	38	165	1379	d__Bacteria; k__norank_d__Bacteria; p__Actinobacteriota; c__Coriobacteriia; o__Coriobacteriales; f__Eggerthellaceae; g__norank_f__Eggerthellaceae	9.5	0	0	0	g__Flavonifractor	-0.20057	-0.20977	-0.25223	-0.21153	-0.17917	-0.19762	-0.18712	-0.34542
d__Bacteria; k__norank_d__Bacteria; p__Firmicutes; c__Clostridia; o__Lachnospirales; f__Lachnospiraceae; g__Lachnospiraceae_NK4A136_group	487.5	1.25	263.5	790.667	d__Bacteria; k__norank_d__Bacteria; p__Firmicutes; c__Clostridia; o__Lachnospirales; f__Lachnospiraceae; g__Eisenbergiella	2.83333	0	1.66667	4.83333	g__Erysipelatoclostridium	-0.15554	-0.18044	-0.14361	-0.12294	-0.3188	-0.18685	-0.20392	-0.26045
d__Bacteria; k__norank_d__Bacteria; p__Firmicutes; c__Clostridia; o__Clostridiales; f__Clostridiaceae; g__Clostridium_sensu_stricto_13	1.16667	439.625	0.166667	1095.67	d__Bacteria; k__norank_d__Bacteria; p__Firmicutes; c__Clostridia; o__Eubacteriales; f__Anaerofustaceae; g__Anaerofustis	2	0.125	2.66667	4.16667	g__Mucispirillum	-0.0767	-0.11874	-0.13451	-0.1163	-0.14003	-0.14233	-0.17397	-0.16509
d__Bacteria; k__norank_d__Bacteria; p__Firmicutes; c__Clostridia; o__Oscillospirales; f__Oscillospiraceae; g__Flavonifractor	12.8333	148	736.667	445	d__Bacteria; k__norank_d__Bacteria; p__Firmicutes; c__Clostridia; o__Lachnospirales; f__Lachnospiraceae; g__ASF356	0.5	0.125	1.5	5.5	g__Colidextribacter	-0.07113	-0.19513	-0.20363	-0.17754	-0.37364	-0.20921	-0.24907	-0.29689
d__Bacteria; k__norank_d__Bacteria; p__Firmicutes; c__Bacilli; o__Erysipelotrichales; f__Erysipelatoclostridiaceae; g__Erysipelatoclostridium	254.667	52	692.5	52.1667	d__Bacteria; k__norank_d__Bacteria; p__Firmicutes; c__Clostridia; o__Lachnospirales; f__Lachnospiraceae; g__Anaerostipes	0	0.375	6.16667	0.5	g__norank_f__Ruminococcaceae	-0.16508	-0.19519	-0.18929	-0.17931	-0.17071	-0.19887	-0.23045	-0.29251
d__Bacteria; k__norank_d__Bacteria; p__Deferribacterota; c__Deferribacteres; o__Deferribacterales; f__Deferribacteraceae; g__Mucispirillum	31.1667	32.5	653	233.833	d__Bacteria; k__norank_d__Bacteria; p__Firmicutes; c__Clostridia; o__Lachnospirales; f__Lachnospiraceae; g__Tuzzerella	0.5	0.125	2.66667	3.66667	g__Staphylococcus	-0.14356	-0.14407	-0.14238	-0.13419	-0.32242	-0.15158	-0.16589	-0.22641
d__Bacteria; k__norank_d__Bacteria; p__Firmicutes; c__Clostridia; o__Oscillospirales; f__Oscillospiraceae; g__Colidextribacter	280.5	22.25	439.333	51.6667	d__Bacteria; k__norank_d__Bacteria; p__Firmicutes; c__Bacilli; o__Erysipelotrichales; f__Erysipelatoclostridiaceae; g__norank_f__Erysipelatoclostridiaceae	0.5	0.25	1.5	3.5	g__unclassified_f__Lachnospiraceae	-0.07519	-0.13175	-0.13358	-0.12489	-0.01293	-0.13911	-0.17307	-0.19049
d__Bacteria; k__norank_d__Bacteria; p__Firmicutes; c__Clostridia; o__Oscillospirales; f__Ruminococcaceae; g__norank_f__Ruminococcaceae	250.5	4.625	160.833	170.833	d__Bacteria; k__norank_d__Bacteria; p__Firmicutes; c__Bacilli; o__Staphylococcales; f__Staphylococcaceae; g__Jeotgalicoccus	3.16667	0.375	0	0.166667		IL17	IL1b	NOD2	AhR	TGFb	EMR1	TNFa	CD127
d__Bacteria; k__norank_d__Bacteria; p__Firmicutes; c__Bacilli; o__Staphylococcales; f__Staphylococcaceae; g__Staphylococcus	395.5	0.25	175.667	0.166667	d__Bacteria; k__norank_d__Bacteria; p__Proteobacteria; c__Gammaproteobacteria; o__Burkholderiales; f__Alcaligenaceae; g__Paenalcaligenes	3.66667	0	0	0	g__Escherichia-Shigella	0.40241	0.44619	0.51713	0.52902	0.50138	0.49937	0.56535	0.58356
d__Bacteria; k__norank_d__Bacteria; p__Firmicutes; c__Clostridia; o__Lachnospirales; f__Lachnospiraceae; g__unclassified_f__Lachnospiraceae	85.3333	6	161.5	310.167	d__Bacteria; k__norank_d__Bacteria; p__Firmicutes; c__Clostridia; o__Peptostreptococcales-Tissierellales; f__Anaerovoracaceae; g__Eubacterium_brachy_group	1.83333	0.5	1	0	g__Faecalibaculum	-0.20596	-0.21858	-0.2501	-0.2375	-0.24317	-0.24773	-0.24493	-0.24714
d__Bacteria; k__norank_d__Bacteria; p__Bacteroidota; c__Bacteroidia; o__Bacteroidales; f__Muribaculaceae; g__Muribaculum	20.5	20.125	417.667	63.1667	d__Bacteria; k__norank_d__Bacteria; p__Firmicutes; c__Clostridia; o__Oscillospirales; f__Ruminococcaceae; g__Harryflintia	1.16667	0	0	1.66667	g__Parabacteroides	-0.24723	-0.25328	-0.25358	-0.25365	-0.21254	-0.2141	-0.32543	-0.35648
d__Bacteria; k__norank_d__Bacteria; p__Actinobacteriota; c__Coriobacteriia; o__Coriobacteriales; f__Eggerthellaceae; g__Adlercreutzia	439	12.125	6.33333	1.33333	d__Bacteria; k__norank_d__Bacteria; p__Firmicutes; c__unclassified_p__Firmicutes; o__unclassified_p__Firmicutes; f__unclassified_p__Firmicutes; g__unclassified_p__Firmicutes	0	0	0	2.83333	g__Enterococcus	0.82752	0.74326	0.79591	0.71517	0.72318	0.71933	0.85654	0.76404
d__Bacteria; k__norank_d__Bacteria; p__Firmicutes; c__Clostridia; o__Lachnospirales; f__Lachnospiraceae; g__Eubacterium_fissicatena_group	151.667	40.375	92.3333	172.667	d__Bacteria; k__norank_d__Bacteria; p__Firmicutes; c__Clostridia; o__Oscillospirales; f__norank_o__Oscillospirales; g__norank_f__norank_o__Oscillospirales	0	1.125	0	1.5	g__Enterobacter	-0.11534	-0.12667	-0.1333	-0.13625	-0.12816	-0.12026	-0.15592	-0.15497
d__Bacteria; k__norank_d__Bacteria; p__Proteobacteria; c__Gammaproteobacteria; o__Enterobacterales; f__Hafniaceae; g__Hafnia-Obesumbacterium	0.5	1.375	5.66667	448.5	d__Bacteria; k__norank_d__Bacteria; p__Firmicutes; c__Clostridia; o__Clostridia_UCG-014; f__norank_o__Clostridia_UCG-014; g__norank_f__norank_o__Clostridia_UCG-014	0	0.125	1.83333	0	g__Akkermansia	-0.17736	-0.18774	-0.21511	-0.20739	-0.21205	-0.213	-0.2362	-0.22298
d__Bacteria; k__norank_d__Bacteria; p__Firmicutes; c__Clostridia; o__Lachnospirales; f__Lachnospiraceae; g__norank_f__Lachnospiraceae	324.333	0.75	43	84.1667	d__Bacteria; k__norank_d__Bacteria; p__Firmicutes; c__Clostridia; o__Oscillospirales; f__Butyricicoccaceae; g__UCG-009	0	0.25	1.66667	0	g__norank_f__Muribaculaceae	-0.20809	-0.22312	-0.26076	-0.26441	-0.25675	-0.25456	-0.28359	-0.27541
d__Bacteria; k__norank_d__Bacteria; p__Actinobacteriota; c__Coriobacteriia; o__Coriobacteriales; f__Eggerthellaceae; g__Enterorhabdus	171	8	229.333	14.8333	d__Bacteria; k__norank_d__Bacteria; p__Firmicutes; c__Clostridia; o__Oscillospirales; f__Ruminococcaceae; g__unclassified_f__Ruminococcaceae	1	0.125	0.166667	0	g__Blautia	-0.16691	-0.16578	-0.21341	-0.22544	-0.21042	-0.20882	-0.24645	-0.23983
d__Bacteria; k__norank_d__Bacteria; p__Firmicutes; c__Clostridia; o__Oscillospirales; f__Eubacterium_coprostanoligenes_group; g__norank_f__Eubacterium_coprostanoligenes_group	72.6667	36.25	149.833	30.5	d__Bacteria; k__norank_d__Bacteria; p__Firmicutes; c__Clostridia; o__norank_c__Clostridia; f__norank_o__norank_c__Clostridia; g__norank_f__norank_o__norank_c__Clostridia	0	0.125	0.166667	1	g__Romboutsia	-0.26329	-0.29612	-0.23332	-0.18588	-0.1781	-0.18187	-0.26084	-0.19572
d__Bacteria; k__norank_d__Bacteria; p__Firmicutes; c__Clostridia; o__Lachnospirales; f__Lachnospiraceae; g__Lachnoclostridium	155.833	6.75	105.667	20	d__Bacteria; k__norank_d__Bacteria; p__Firmicutes; c__Clostridia; o__Monoglobales; f__Monoglobaceae; g__Monoglobus	1.16667	0	0	0	g__Coriobacteriaceae_UCG-002	-0.25593	-0.27255	-0.31149	-0.30864	-0.3053	-0.30475	-0.33795	-0.32775
d__Bacteria; k__norank_d__Bacteria; p__Firmicutes; c__Clostridia; o__Lachnospirales; f__Lachnospiraceae; g__Ruminococcus_torques_group	68.8333	6.25	26.5	57.1667	d__Bacteria; k__norank_d__Bacteria; p__Firmicutes; c__Bacilli; o__Lactobacillales; f__Aerococcaceae; g__Aerococcus	0	0	0	1	g__Lactobacillus	-0.08319	-0.08624	-0.10173	-0.10462	-0.09935	-0.09185	-0.11118	-0.1044
d__Bacteria; k__norank_d__Bacteria; p__Firmicutes; c__Clostridia; o__Lachnospirales; f__Lachnospiraceae; g__GCA-900066575	77.6667	0.25	34.1667	20.3333	d__Bacteria; k__norank_d__Bacteria; p__Firmicutes; c__Bacilli; o__Erysipelotrichales; f__Erysipelatoclostridiaceae; g__Candidatus_Stoquefichus	0.5	0	0.5	0	g__Lachnospiraceae_NK4A136_group	-0.15403	-0.16399	-0.18914	-0.19114	-0.1863	-0.17919	-0.21033	-0.20115
d__Bacteria; k__norank_d__Bacteria; p__Firmicutes; c__Clostridia; o__Lachnospirales; f__Lachnospiraceae; g__Frisingicoccus	27.6667	19.625	35	43.8333	d__Bacteria; k__norank_d__Bacteria; p__Actinobacteriota; c__Coriobacteriia; o__Coriobacteriales; f__Eggerthellaceae; g__Parvibacter	0	0.125	0.666667	0	g__Clostridium_sensu_stricto_13	0.05454	0.13163	0.00707	-0.0559	0.00199	0.01116	0.02515	-0.02636
d__Bacteria; k__norank_d__Bacteria; p__Firmicutes; c__Clostridia; o__Oscillospirales; f__Ruminococcaceae; g__Paludicola	0.833333	24.875	71.6667	16.1667	d__Bacteria; k__norank_d__Bacteria; p__Proteobacteria; c__Alphaproteobacteria; o__Rickettsiales; f__Mitochondria; g__norank_f__Mitochondria	0.666667	0.125	0	0	g__Flavonifractor	-0.28655	-0.31882	-0.34648	-0.34262	-0.3337	-0.3309	-0.3463	-0.30572
d__Bacteria; k__norank_d__Bacteria; p__Firmicutes; c__Clostridia; o__Peptostreptococcales-Tissierellales; f__Anaerovoracaceae; g__Family_XIII_AD3011_group	0.333333	44.625	58.3333	0	d__Bacteria; k__norank_d__Bacteria; p__Firmicutes; c__Clostridia; o__Lachnospirales; f__Lachnospiraceae; g__Lachnospiraceae_FCS020_group	0.333333	0	0.333333	0	g__Erysipelatoclostridium	-0.21892	-0.23516	-0.25622	-0.25525	-0.2454	-0.24516	-0.29465	-0.27802
d__Bacteria; k__norank_d__Bacteria; p__Firmicutes; c__Clostridia; o__Oscillospirales; f__Ruminococcaceae; g__Anaerotruncus	78.8333	0.25	20.6667	1.16667	d__Bacteria; k__norank_d__Bacteria; p__Bacteroidota; c__Bacteroidia; o__Bacteroidales; f__Prevotellaceae; g__Prevotellaceae_UCG-001	0.5	0.125	0	0	g__Mucispirillum	-0.15623	-0.15006	-0.19678	-0.21008	-0.19542	-0.18936	-0.19676	-0.21534
d__Bacteria; k__norank_d__Bacteria; p__Firmicutes; c__Bacilli; o__Erysipelotrichales; f__Erysipelotrichaceae; g__Turicibacter	34	2.5	51.3333	10.8333	d__Bacteria; k__norank_d__Bacteria; p__Proteobacteria; c__Alphaproteobacteria; o__Rhizobiales; f__Beijerinckiaceae; g__Methylobacterium-Methylorubrum	0.5	0.125	0	0	g__Colidextribacter	-0.25418	-0.26973	-0.31624	-0.3215	-0.31094	-0.31389	-0.34958	-0.32925
d__Bacteria; k__norank_d__Bacteria; p__Firmicutes; c__Clostridia; o__Lachnospirales; f__Lachnospiraceae; g__Roseburia	97.3333	0	0	0	d__Bacteria; k__norank_d__Bacteria; p__Proteobacteria; c__Gammaproteobacteria; o__Pseudomonadales; f__Pseudomonadaceae; g__Pseudomonas	0.166667	0.25	0	0.166667	g__norank_f__Ruminococcaceae	-0.23758	-0.25258	-0.2926	-0.29463	-0.28847	-0.2819	-0.32719	-0.30781
d__Bacteria; k__norank_d__Bacteria; p__Firmicutes; c__Clostridia; o__Oscillospirales; f__Oscillospiraceae; g__Oscillibacter	39.1667	3	29.3333	23.3333	d__Bacteria; k__norank_d__Bacteria; p__Firmicutes; c__Bacilli; o__Lactobacillales; f__Carnobacteriaceae; g__Atopostipes	0.333333	0	0.166667	0	g__Staphylococcus	-0.18134	-0.19261	-0.22252	-0.21884	-0.2179	-0.21536	-0.25035	-0.23024
d__Bacteria; k__norank_d__Bacteria; p__Desulfobacterota; c__Desulfovibrionia; o__Desulfovibrionales; f__Desulfovibrionaceae; g__Desulfovibrio	0	0	87.8333	0	d__Bacteria; k__norank_d__Bacteria; p__Actinobacteriota; c__Actinobacteria; o__Corynebacteriales; f__Corynebacteriaceae; g__Corynebacterium	0.333333	0.125	0	0	g__unclassified_f__Lachnospiraceae	-0.16447	-0.17062	-0.20667	-0.21328	-0.20391	-0.1986	-0.22435	-0.22067
d__Bacteria; k__norank_d__Bacteria; p__Firmicutes; c__Bacilli; o__Acholeplasmatales; f__Acholeplasmataceae; g__Anaeroplasma	0	0	81.1667	0	d__Bacteria; k__norank_d__Bacteria; p__Firmicutes; c__Clostridia; o__Oscillospirales; f__Ruminococcaceae; g__Candidatus_Soleaferrea	0.333333	0	0	0		Id2	IL23R	IL23	RORgt	GMCSF	RORa	IL21	occludin
d__Bacteria; k__norank_d__Bacteria; p__Firmicutes; c__Clostridia; o__Clostridiales; f__Clostridiaceae; g__Clostridium_sensu_stricto_1	75.3333	1.5	0.833333	1	d__Bacteria; k__norank_d__Bacteria; p__Actinobacteriota; c__Acidimicrobiia; o__Microtrichales; f__Ilumatobacteraceae; g__CL500-29_marine_group	0	0	0.333333	0	g__Escherichia-Shigella	0.57481	0.58787	0.57447	0.59371	0.4575	0.50719	0.50105	-0.68839
d__Bacteria; k__norank_d__Bacteria; p__Firmicutes; c__Clostridia; o__Oscillospirales; f__Ruminococcaceae; g__UBA1819	0.166667	26.75	32.8333	11	d__Bacteria; k__norank_d__Bacteria; p__Firmicutes; c__Clostridia; o__Lachnospirales; f__Lachnospiraceae; g__Eubacterium_xylanophilum_group	0.333333	0	0	0	g__Faecalibaculum	-0.24416	-0.25897	-0.23431	-0.22429	-0.21656	-0.23066	-0.2308	0.73745
d__Bacteria; k__norank_d__Bacteria; p__Firmicutes; c__Clostridia; o__Lachnospirales; f__Lachnospiraceae; g__Marvinbryantia	59.3333	0.25	2.5	4.83333	d__Bacteria; k__norank_d__Bacteria; p__Firmicutes; c__Bacilli; o__RF39; f__norank_o__RF39; g__norank_f__norank_o__RF39	0	0	0.333333	0	g__Parabacteroides	-0.29747	-0.3117	-0.32535	-0.34146	-0.15113	-0.20233	-0.17731	-0.25514
d__Bacteria; k__norank_d__Bacteria; p__Firmicutes; c__Clostridia; o__Oscillospirales; f__Oscillospiraceae; g__norank_f__Oscillospiraceae	14.5	4.375	27	13.3333	d__Bacteria; k__norank_d__Bacteria; p__Proteobacteria; c__Gammaproteobacteria; o__Pseudomonadales; f__Moraxellaceae; g__Acinetobacter	0	0.25	0	0	g__Enterococcus	0.72557	0.75739	0.61202	0.51041	0.52484	0.60565	0.50396	-0.60378
d__Bacteria; k__norank_d__Bacteria; p__Firmicutes; c__Bacilli; o__Lactobacillales; f__Streptococcaceae; g__Streptococcus	28.5	3	10.8333	3	d__Bacteria; k__norank_d__Bacteria; p__Proteobacteria; c__Gammaproteobacteria; o__Pseudomonadales; f__Moraxellaceae; g__Psychrobacter	0.166667	0	0	0	g__Enterobacter	-0.15063	-0.14421	-0.13887	-0.1442	-0.10694	-0.12758	-0.11949	-0.30372
d__Bacteria; k__norank_d__Bacteria; p__Bacteroidota; c__Bacteroidia; o__Bacteroidales; f__Bacteroidaceae; g__Bacteroides	0.5	35	0	0	d__Bacteria; k__norank_d__Bacteria; p__Firmicutes; c__Clostridia; o__Peptostreptococcales-Tissierellales; f__Anaerovoracaceae; g__unclassified_f__Anaerovoracaceae	0.166667	0	0	0	g__Akkermansia	-0.21854	-0.23281	-0.20449	-0.20072	-0.18845	-0.20091	-0.20003	0.7713
d__Bacteria; k__norank_d__Bacteria; p__Firmicutes; c__Clostridia; o__Peptococcales; f__Peptococcaceae; g__norank_f__Peptococcaceae	20.1667	2.125	4.66667	4.5	d__Bacteria; k__norank_d__Bacteria; p__Spirochaetota; c__Spirochaetia; o__Spirochaetales; f__Spirochaetaceae; g__Sphaerochaeta	0	0	0.166667	0	g__norank_f__Muribaculaceae	-0.28438	-0.28192	-0.2561	-0.25846	-0.22584	-0.25365	-0.24257	0.17301
d__Bacteria; k__norank_d__Bacteria; p__Bacteroidota; c__Bacteroidia; o__Bacteroidales; f__unclassified_o__Bacteroidales; g__unclassified_o__Bacteroidales	27.6667	0	0.5	0.333333	d__Bacteria; k__norank_d__Bacteria; p__Firmicutes; c__Clostridia; o__Lachnospirales; f__Lachnospiraceae; g__Lachnospiraceae_UCG-010	0	0	0.166667	0	g__Blautia	-0.24077	-0.24731	-0.23175	-0.2479	-0.19565	-0.20879	-0.19024	0.42861
d__Bacteria; k__norank_d__Bacteria; p__Firmicutes; c__Clostridia; o__Clostridia_vadinBB60_group; f__norank_o__Clostridia_vadinBB60_group; g__norank_f__norank_o__Clostridia_vadinBB60_group	5.33333	0	10.5	12.6667	d__Bacteria; k__norank_d__Bacteria; p__Firmicutes; c__Clostridia; o__Oscillospirales; f__Butyricicoccaceae; g__Butyricicoccus	0.166667	0	0	0	g__Romboutsia	-0.20123	-0.22307	-0.25558	-0.1874	-0.12443	-0.17398	-0.21111	0.47677
d__Bacteria; k__norank_d__Bacteria; p__Firmicutes; c__Clostridia; o__Oscillospirales; f__Oscillospiraceae; g__unclassified_f__Oscillospiraceae	0.5	0.75	20.8333	5.5	d__Bacteria; k__norank_d__Bacteria; p__Cyanobacteria; c__Cyanobacteriia; o__Chloroplast; f__norank_o__Chloroplast; g__norank_f__norank_o__Chloroplast	0	0	0.166667	0	g__Coriobacteriaceae_UCG-002	-0.32737	-0.33385	-0.29995	-0.30204	-0.27071	-0.2956	-0.28918	0.77036
Percent of community abundance on Phylum level										g__Lactobacillus	-0.11046	-0.10817	-0.105	-0.09774	-0.08973	-0.09946	-0.09564	-0.08249
OTU ID	NC	PC	FPH	FPL						g__Lachnospiraceae_NK4A136_group	-0.20362	-0.20183	-0.18627	-0.1831	-0.16494	-0.18179	-0.17565	0.11949
d__Bacteria; k__norank_d__Bacteria; p__Proteobacteria	9.83333	23037.4	11784.3	16581.2						g__Clostridium_sensu_stricto_13	-0.04654	-0.05677	-0.0891	-0.12869	-0.05512	-0.03509	0.03219	-0.49931
d__Bacteria; k__norank_d__Bacteria; p__Firmicutes	20638.7	4352.62	6709.33	7756						g__Flavonifractor	-0.3604	-0.34159	-0.33149	-0.29648	-0.30191	-0.34234	-0.35175	-0.22973
d__Bacteria; k__norank_d__Bacteria; p__Bacteroidota	2056.5	1607.12	9168.67	4426						g__Erysipelatoclostridium	-0.27748	-0.27992	-0.25966	-0.26179	-0.20898	-0.23986	-0.22896	0.26118
d__Bacteria; k__norank_d__Bacteria; p__Verrucomicrobiota	4526.17	0.125	0	0						g__Mucispirillum	-0.2221	-0.2191	-0.20595	-0.19767	-0.18357	-0.19414	-0.18018	-0.07909
d__Bacteria; k__norank_d__Bacteria; p__Actinobacteriota	1817.67	50.25	675.667	83						g__Colidextribacter	-0.34396	-0.33798	-0.30812	-0.31798	-0.27618	-0.30638	-0.28836	0.19543
d__Bacteria; k__norank_d__Bacteria; p__Deferribacterota	31.1667	32.5	653	233.833						g__norank_f__Ruminococcaceae	-0.31442	-0.31451	-0.28564	-0.28559	-0.25682	-0.28204	-0.27144	0.33247
d__Bacteria; k__norank_d__Bacteria; p__Desulfobacterota	0	0	87.8333	0						g__Staphylococcus	-0.23387	-0.24014	-0.21073	-0.21328	-0.1937	-0.21245	-0.20617	0.55091
d__Bacteria; k__norank_d__Bacteria; p__unclassified_k__norank_d__Bacteria	0	0	0.833333	0						g__unclassified_f__Lachnospiraceae	-0.22785	-0.22247	-0.20651	-0.2058	-0.18147	-0.20111	-0.18787	-0.07984
d__Bacteria; k__norank_d__Bacteria; p__Spirochaetota	0	0	0.166667	0							cludin3	ZO1	cludin1	cludin2	MUC2	MUC4
d__Bacteria; k__norank_d__Bacteria; p__Cyanobacteria	0	0	0.166667	0						g__Escherichia-Shigella	-0.59427	-0.22884	-0.03154	-0.25202	-0.14386	-0.1319
										g__Faecalibaculum	0.60947	0.34013	0.25982	0.30456	0.08495	0.07969
										g__Parabacteroides	-0.25486	0.15606	0.11223	-0.33708	-0.07325	-0.19374
										g__Enterococcus	-0.6429	-0.4253	-0.07097	-0.31887	-0.23485	-0.14857
										g__Enterobacter	-0.21174	-0.36603	-0.2847	-0.04363	-0.11193	0.11566
										g__Akkermansia	0.51316	0.15953	0.00226	0.20721	0.25529	0.24347
										g__norank_f__Muribaculaceae	0.21646	0.25951	-0.11915	0.00866	-0.00701	-0.09841
										g__Blautia	0.25265	0.09485	-0.08421	0.10526	0.32589	0.09712
										g__Romboutsia	0.36959	0.1122	-0.11164	0.07717	0.03466	0.07061
										g__Coriobacteriaceae_UCG-002	0.64847	0.30665	0.01054	0.47554	0.12957	0.03541
										g__Lactobacillus	0.15591	-0.12109	-0.15585	0.21078	0.13972	0.17631
										g__Lachnospiraceae_NK4A136_group	0.31465	-0.05167	-0.11101	0.34544	0.1599	0.15237
										g__Clostridium_sensu_stricto_13	-0.38765	-0.26634	-0.22199	-0.0932	-0.09842	0.06276
										g__Flavonifractor	0.02304	-0.09247	-0.15526	-0.10622	-0.00498	0.10106
										g__Erysipelatoclostridium	0.17918	0.13886	-0.07409	-0.08696	-0.12314	-0.13159
										g__Mucispirillum	0.19282	0.14568	-0.0914	0.07867	0.31436	0.26927
										g__Colidextribacter	0.08846	0.08631	0.21688	-0.10325	0.02121	-0.12804
										g__norank_f__Ruminococcaceae	0.40924	0.00644	-0.04688	0.35905	0.14811	0.0795
										g__Staphylococcus	0.40778	0.15709	0.12542	0.37771	-0.11563	-0.1967
										g__unclassified_f__Lachnospiraceae	0.12892	-0.03558	-0.04348	0.1175	0.17572	0.12175

## Sheet: Supplement figure 1
NO.	Identification	tR (min)	Formula	Adduct	M/Z	Error (ppm)	Main MS/MS fragments detected	Category
1	cyrtonemoside A	14	C51H80O24	[M+H]+	1077.51	-0.2	1077.5105、915.4695、753.4057、591.3524	Saponin
2	kingianoside Z	13.95	C57H90O29	[M+H]+	1239.56	-1.3	1077.5186、573.3438、753.4028、915.4881	Saponin
3	kingianoside A	13.9	C39H60O14	[M+H]+	753.405	-0.5	591.3498、753.4014	Saponin

## Sheet: Supplement figure 2
	Hierarchical clustering tree on OUT level								Hierarchical clustering tree on OUT level						Hierarchical clustering tree on OUT level							Hierarchical clustering tree on OUT level
OTU ID	NC1	NC2	NC3	NC4	NC5	NC6		OTU ID	PC1	PC2	PC3	PC4	PC5	PC6	OTU ID	FPH1	FPH2	FPH3	FPH4	FPH5	FPH6	OTU ID	FPL1	FPL2	FPL3	FPL4	FPL5	FPL6
d__Bacteria; k__norank_d__Bacteria; p__Proteobacteria; c__Gammaproteobacteria; o__Enterobacterales; f__Enterobacteriaceae; g__Escherichia-Shigella; s__Escherichia_coli_g__Escherichia-Shigella; OTU374	0	3.43879e-05	0	0	0	0		d__Bacteria; k__norank_d__Bacteria; p__Proteobacteria; c__Gammaproteobacteria; o__Enterobacterales; f__Enterobacteriaceae; g__Escherichia-Shigella; s__Escherichia_coli_g__Escherichia-Shigella; OTU374	0.896802	0.573487	0.793948	0.930983	0.795667	0.679402	d__Bacteria; k__norank_d__Bacteria; p__Proteobacteria; c__Gammaproteobacteria; o__Enterobacterales; f__Enterobacteriaceae; g__Escherichia-Shigella; s__Escherichia_coli_g__Escherichia-Shigella; OTU374	0.242297	0.511073	0.515406	0.121939	0.304711	0.732015	d__Bacteria; k__norank_d__Bacteria; p__Proteobacteria; c__Gammaproteobacteria; o__Enterobacterales; f__Enterobacteriaceae; g__Escherichia-Shigella; s__Escherichia_coli_g__Escherichia-Shigella; OTU374	0.586107	0.545358	0.722627	0.191609	0.318294	0.0150963
d__Bacteria; k__norank_d__Bacteria; p__Firmicutes; c__Bacilli; o__Erysipelotrichales; f__Erysipelotrichaceae; g__Faecalibaculum; s__Faecalibaculum_rodentium; OTU137	0.828989	0.810007	0.127957	0.485248	0.197146	0.616678		d__Bacteria; k__norank_d__Bacteria; p__Firmicutes; c__Bacilli; o__Erysipelotrichales; f__Erysipelotrichaceae; g__Faecalibaculum; s__Faecalibaculum_rodentium; OTU137	0.00154746	0.00110041	0.00897524	0.000171939	0.00127235	0.000378267	d__Bacteria; k__norank_d__Bacteria; p__Firmicutes; c__Bacilli; o__Erysipelotrichales; f__Erysipelotrichaceae; g__Faecalibaculum; s__Faecalibaculum_rodentium; OTU137	0.0241403	0.00649931	0.0650619	0.115475	0.000618982	0.00206327	d__Bacteria; k__norank_d__Bacteria; p__Firmicutes; c__Bacilli; o__Erysipelotrichales; f__Erysipelotrichaceae; g__Faecalibaculum; s__Faecalibaculum_rodentium; OTU137	0.00601788	0.0051238	6.87758e-05	0.00120358	0.00196011	0.0225928
d__Bacteria; k__norank_d__Bacteria; p__Bacteroidota; c__Bacteroidia; o__Bacteroidales; f__Tannerellaceae; g__Parabacteroides; s__Parabacteroides_goldsteinii; OTU102	0.0025447	0.00151307	0.162448	0.00808116	0.0560867	0.00116919		d__Bacteria; k__norank_d__Bacteria; p__Bacteroidota; c__Bacteroidia; o__Bacteroidales; f__Tannerellaceae; g__Parabacteroides; s__Parabacteroides_goldsteinii; OTU102	0.0183287	0.146802	0.0262724	0.00196011	3.43879e-05	0.0302957	d__Bacteria; k__norank_d__Bacteria; p__Bacteroidota; c__Bacteroidia; o__Bacteroidales; f__Tannerellaceae; g__Parabacteroides; s__Parabacteroides_goldsteinii; OTU102	0.212758	0.326444	0.107669	0.276582	0.410351	0.091403	d__Bacteria; k__norank_d__Bacteria; p__Bacteroidota; c__Bacteroidia; o__Bacteroidales; f__Tannerellaceae; g__Parabacteroides; s__Parabacteroides_goldsteinii; OTU102	0.178645	0.263858	0.0415062	0.0644429	0.092022	0.0551582
d__Bacteria; k__norank_d__Bacteria; p__Firmicutes; c__Bacilli; o__Lactobacillales; f__Enterococcaceae; g__Enterococcus; s__Enterococcus_faecalis_g__Enterococcus; OTU370	0.000137552	0	0	0.000240715	0.000103164	0		d__Bacteria; k__norank_d__Bacteria; p__Firmicutes; c__Bacilli; o__Lactobacillales; f__Enterococcaceae; g__Enterococcus; s__Enterococcus_faecalis_g__Enterococcus; OTU370	0.00735901	0.0885832	0.0910935	0.0507909	0.158872	0.254574	d__Bacteria; k__norank_d__Bacteria; p__Firmicutes; c__Bacilli; o__Lactobacillales; f__Enterococcaceae; g__Enterococcus; s__Enterococcus_faecalis_g__Enterococcus; OTU370	0.000137552	0.000481431	0.0281637	0.000618982	0.0525791	0.0230055	d__Bacteria; k__norank_d__Bacteria; p__Firmicutes; c__Bacilli; o__Lactobacillales; f__Enterococcaceae; g__Enterococcus; s__Enterococcus_faecalis_g__Enterococcus; OTU370	0.0797455	0.0385144	0.160351	0.0673659	0.0615887	0.0167125
d__Bacteria; k__norank_d__Bacteria; p__Proteobacteria; c__Gammaproteobacteria; o__Enterobacterales; f__Enterobacteriaceae; g__Enterobacter; s__unclassified_g__Enterobacter; OTU369	0.000378267	0.000137552	0	6.87758e-05	6.87758e-05	0.000171939		d__Bacteria; k__norank_d__Bacteria; p__Proteobacteria; c__Gammaproteobacteria; o__Enterobacterales; f__Enterobacteriaceae; g__Enterobacter; s__unclassified_g__Enterobacter; OTU369	0.00629298	0.0626204	0.000103164	0.005674	0.00309491	0.00422971	d__Bacteria; k__norank_d__Bacteria; p__Proteobacteria; c__Gammaproteobacteria; o__Enterobacterales; f__Enterobacteriaceae; g__Enterobacter; s__unclassified_g__Enterobacter; OTU369	0.00182256	0	0.000859697	3.43879e-05	6.87758e-05	3.43879e-05	d__Bacteria; k__norank_d__Bacteria; p__Proteobacteria; c__Gammaproteobacteria; o__Enterobacterales; f__Enterobacteriaceae; g__Enterobacter; s__unclassified_g__Enterobacter; OTU369	0.000103164	0.000309491	0	0.5163	0.361726	0.0710454
d__Bacteria; k__norank_d__Bacteria; p__Verrucomicrobiota; c__Verrucomicrobiae; o__Verrucomicrobiales; f__Akkermansiaceae; g__Akkermansia; s__Akkermansia_muciniphila; OTU268	0.072696	0.0494154	0.13456	0.103404	0.332393	0.241403		d__Bacteria; k__norank_d__Bacteria; p__Verrucomicrobiota; c__Verrucomicrobiae; o__Verrucomicrobiales; f__Akkermansiaceae; g__Akkermansia; s__Akkermansia_muciniphila; OTU268	0	0	3.43879e-05	0	0	0	d__Bacteria; k__norank_d__Bacteria; p__Verrucomicrobiota; c__Verrucomicrobiae; o__Verrucomicrobiales; f__Akkermansiaceae; g__Akkermansia; s__Akkermansia_muciniphila; OTU268	0	0	0	0	0	0	d__Bacteria; k__norank_d__Bacteria; p__Verrucomicrobiota; c__Verrucomicrobiae; o__Verrucomicrobiales; f__Akkermansiaceae; g__Akkermansia; s__Akkermansia_muciniphila; OTU268	0	0	0	0	0	0
d__Bacteria; k__norank_d__Bacteria; p__Firmicutes; c__Clostridia; o__Lachnospirales; f__Lachnospiraceae; g__Blautia; s__Lachnospiraceae_bacterium_28-4; OTU47	0.00213205	0.0342503	0.198246	0.0734525	0.0318088	0.0238996		d__Bacteria; k__norank_d__Bacteria; p__Firmicutes; c__Clostridia; o__Lachnospirales; f__Lachnospiraceae; g__Blautia; s__Lachnospiraceae_bacterium_28-4; OTU47	0	0	0.000515818	6.87758e-05	0	0	d__Bacteria; k__norank_d__Bacteria; p__Firmicutes; c__Clostridia; o__Lachnospirales; f__Lachnospiraceae; g__Blautia; s__Lachnospiraceae_bacterium_28-4; OTU47	0.0135144	0.00883769	0.0215612	0.0825309	0.00773728	0.00457359	d__Bacteria; k__norank_d__Bacteria; p__Firmicutes; c__Clostridia; o__Lachnospirales; f__Lachnospiraceae; g__Blautia; s__Lachnospiraceae_bacterium_28-4; OTU47	0.00409216	0.000756534	3.43879e-05	0	0.0014099	0.0246561
d__Bacteria; k__norank_d__Bacteria; p__Firmicutes; c__Clostridia; o__Peptostreptococcales-Tissierellales; f__Peptostreptococcaceae; g__Romboutsia; s__Romboutsia_ilealis; OTU110	0.0257565	0.0126204	0.0276135	0.027304	0.0235557	0.036795		d__Bacteria; k__norank_d__Bacteria; p__Firmicutes; c__Clostridia; o__Peptostreptococcales-Tissierellales; f__Peptostreptococcaceae; g__Romboutsia; s__Romboutsia_ilealis; OTU110	0.000171939	0.00147868	0.00178817	0.000928473	0.0204952	0.000206327	d__Bacteria; k__norank_d__Bacteria; p__Firmicutes; c__Clostridia; o__Peptostreptococcales-Tissierellales; f__Peptostreptococcaceae; g__Romboutsia; s__Romboutsia_ilealis; OTU110	0.00502063	0.00429849	0.0143398	0.0627579	0.00230399	0.0599725	d__Bacteria; k__norank_d__Bacteria; p__Firmicutes; c__Clostridia; o__Peptostreptococcales-Tissierellales; f__Peptostreptococcaceae; g__Romboutsia; s__Romboutsia_ilealis; OTU110	0.000412655	0.00147868	0.00202889	0.000756534	0.00178817	0.0440853
d__Bacteria; k__norank_d__Bacteria; p__Actinobacteriota; c__Coriobacteriia; o__Coriobacteriales; f__Atopobiaceae; g__Coriobacteriaceae_UCG-002; s__uncultured_bacterium_g__Coriobacteriaceae_UCG-002; OTU125	0.0234525	0.0160935	0.0452201	0.0909904	0.050619	0.0207703		d__Bacteria; k__norank_d__Bacteria; p__Actinobacteriota; c__Coriobacteriia; o__Coriobacteriales; f__Atopobiaceae; g__Coriobacteriaceae_UCG-002; s__uncultured_bacterium_g__Coriobacteriaceae_UCG-002; OTU125	0.000275103	0.000962861	0.00570839	0	6.87758e-05	0.000309491	d__Bacteria; k__norank_d__Bacteria; p__Actinobacteriota; c__Coriobacteriia; o__Coriobacteriales; f__Atopobiaceae; g__Coriobacteriaceae_UCG-002; s__uncultured_bacterium_g__Coriobacteriaceae_UCG-002; OTU125	0.00725585	0.00918157	0.0433631	0.0248624	0.00154746	0.00436726	d__Bacteria; k__norank_d__Bacteria; p__Actinobacteriota; c__Coriobacteriia; o__Coriobacteriales; f__Atopobiaceae; g__Coriobacteriaceae_UCG-002; s__uncultured_bacterium_g__Coriobacteriaceae_UCG-002; OTU125	0.00171939	0.00508941	0	0.000859697	0.00223521	0.00388583
d__Bacteria; k__norank_d__Bacteria; p__Firmicutes; c__Clostridia; o__Clostridiales; f__Clostridiaceae; g__Clostridium_sensu_stricto_13; s__unclassified_g__Clostridium_sensu_stricto_13; OTU368	3.43879e-05	0.000103164	0	0	0	0.000103164		d__Bacteria; k__norank_d__Bacteria; p__Firmicutes; c__Clostridia; o__Clostridiales; f__Clostridiaceae; g__Clostridium_sensu_stricto_13; s__unclassified_g__Clostridium_sensu_stricto_13; OTU368	0.0200825	0.056121	0.00471114	0.000412655	0.00251032	0.00980055	d__Bacteria; k__norank_d__Bacteria; p__Firmicutes; c__Clostridia; o__Clostridiales; f__Clostridiaceae; g__Clostridium_sensu_stricto_13; s__unclassified_g__Clostridium_sensu_stricto_13; OTU368	0	0	0	0	0	3.43879e-05	d__Bacteria; k__norank_d__Bacteria; p__Firmicutes; c__Clostridia; o__Clostridiales; f__Clostridiaceae; g__Clostridium_sensu_stricto_13; s__unclassified_g__Clostridium_sensu_stricto_13; OTU368	0.0150619	0.0209078	0.0421939	0.105433	0.0419188	0.000550206
d__Bacteria; k__norank_d__Bacteria; p__Firmicutes; c__Bacilli; o__Lactobacillales; f__Lactobacillaceae; g__Lactobacillus; s__Lactobacillus_murinus; OTU138	0.000756534	0.000550206	0.00110041	0.00409216	0.00337001	0.00161623		d__Bacteria; k__norank_d__Bacteria; p__Firmicutes; c__Bacilli; o__Lactobacillales; f__Lactobacillaceae; g__Lactobacillus; s__Lactobacillus_murinus; OTU138	0.00103164	3.43879e-05	0.000722146	0.000997249	0.00495186	0.000928473	d__Bacteria; k__norank_d__Bacteria; p__Firmicutes; c__Bacilli; o__Lactobacillales; f__Lactobacillaceae; g__Lactobacillus; s__Lactobacillus_murinus; OTU138	0.00667125	0.000515818	0.00495186	0.00292297	0.00257909	0.0163343	d__Bacteria; k__norank_d__Bacteria; p__Firmicutes; c__Bacilli; o__Lactobacillales; f__Lactobacillaceae; g__Lactobacillus; s__Lactobacillus_murinus; OTU138	0.000412655	0.00275103	0.00467675	0.000997249	0.00220083	0.273487
d__Bacteria; k__norank_d__Bacteria; p__Bacteroidota; c__Bacteroidia; o__Bacteroidales; f__Muribaculaceae; g__norank_f__Muribaculaceae; s__uncultured_bacterium_g__norank_f__Muribaculaceae; OTU130	0.000343879	0.000137552	0.00395461	0.0014099	0.00309491	3.43879e-05		d__Bacteria; k__norank_d__Bacteria; p__Bacteroidota; c__Bacteroidia; o__Bacteroidales; f__Muribaculaceae; g__norank_f__Muribaculaceae; s__uncultured_bacterium_g__norank_f__Muribaculaceae; OTU130	0.00763411	0.0193948	0.00220083	6.87758e-05	0	0.00165062	d__Bacteria; k__norank_d__Bacteria; p__Bacteroidota; c__Bacteroidia; o__Bacteroidales; f__Muribaculaceae; g__norank_f__Muribaculaceae; s__uncultured_bacterium_g__norank_f__Muribaculaceae; OTU130	0.166678	0.00374828	0.00326685	0.0151651	0.00288858	0.000309491	d__Bacteria; k__norank_d__Bacteria; p__Bacteroidota; c__Bacteroidia; o__Bacteroidales; f__Muribaculaceae; g__norank_f__Muribaculaceae; s__uncultured_bacterium_g__norank_f__Muribaculaceae; OTU130	0.0157497	0.0436726	0.000825309	3.43879e-05	0.00185695	0.000240715
d__Bacteria; k__norank_d__Bacteria; p__Firmicutes; c__Clostridia; o__Oscillospirales; f__Oscillospiraceae; g__Flavonifractor; s__uncultured_bacterium_g__Flavonifractor; OTU109	0	0.000171939	0.00220083	0.000137552	0.000103164	3.43879e-05		d__Bacteria; k__norank_d__Bacteria; p__Firmicutes; c__Clostridia; o__Oscillospirales; f__Oscillospiraceae; g__Flavonifractor; s__uncultured_bacterium_g__Flavonifractor; OTU109	0.00588033	0.00147868	0.0174347	0.00134113	0.0093879	0.00103164	d__Bacteria; k__norank_d__Bacteria; p__Firmicutes; c__Clostridia; o__Oscillospirales; f__Oscillospiraceae; g__Flavonifractor; s__uncultured_bacterium_g__Flavonifractor; OTU109	0.0200138	0.0474553	0.032359	0.0280605	0.0163686	0.00773728	d__Bacteria; k__norank_d__Bacteria; p__Firmicutes; c__Clostridia; o__Oscillospirales; f__Oscillospiraceae; g__Flavonifractor; s__uncultured_bacterium_g__Flavonifractor; OTU109	0.0154058	0.00687758	0.000618982	0.0138239	0.0304677	0.0246217
d__Bacteria; k__norank_d__Bacteria; p__Bacteroidota; c__Bacteroidia; o__Bacteroidales; f__Muribaculaceae; g__norank_f__Muribaculaceae; s__uncultured_bacterium_g__norank_f__Muribaculaceae; OTU59	0.000206327	0.000240715	0.00526135	0.00216644	0.00240715	0.000378267		d__Bacteria; k__norank_d__Bacteria; p__Bacteroidota; c__Bacteroidia; o__Bacteroidales; f__Muribaculaceae; g__norank_f__Muribaculaceae; s__uncultured_bacterium_g__norank_f__Muribaculaceae; OTU59	0.00134113	0.00240715	0.000447043	0	3.43879e-05	0.000515818	d__Bacteria; k__norank_d__Bacteria; p__Bacteroidota; c__Bacteroidia; o__Bacteroidales; f__Muribaculaceae; g__norank_f__Muribaculaceae; s__uncultured_bacterium_g__norank_f__Muribaculaceae; OTU59	0.074381	0.00660248	0.000137552	0.0515818	0.00962861	0.000240715	d__Bacteria; k__norank_d__Bacteria; p__Bacteroidota; c__Bacteroidia; o__Bacteroidales; f__Muribaculaceae; g__norank_f__Muribaculaceae; s__uncultured_bacterium_g__norank_f__Muribaculaceae; OTU59	0.00502063	0.0120014	3.43879e-05	0.000137552	0.00127235	0.0343535
d__Bacteria; k__norank_d__Bacteria; p__Firmicutes; c__Bacilli; o__Erysipelotrichales; f__Erysipelatoclostridiaceae; g__Erysipelatoclostridium; s__uncultured_bacterium_g__Erysipelatoclostridium; OTU133	0.00168501	0.00302613	0.00935351	0.00354195	0.0196355	0.00914718		d__Bacteria; k__norank_d__Bacteria; p__Firmicutes; c__Bacilli; o__Erysipelotrichales; f__Erysipelatoclostridiaceae; g__Erysipelatoclostridium; s__uncultured_bacterium_g__Erysipelatoclostridium; OTU133	0.000825309	0.00196011	0.00687758	6.87758e-05	0	0.000103164	d__Bacteria; k__norank_d__Bacteria; p__Firmicutes; c__Bacilli; o__Erysipelotrichales; f__Erysipelatoclostridiaceae; g__Erysipelatoclostridium; s__uncultured_bacterium_g__Erysipelatoclostridium; OTU133	0.072249	0.0156809	0.009663	0.0260316	0.0153026	0.00385144	d__Bacteria; k__norank_d__Bacteria; p__Firmicutes; c__Bacilli; o__Erysipelotrichales; f__Erysipelatoclostridiaceae; g__Erysipelatoclostridium; s__uncultured_bacterium_g__Erysipelatoclostridium; OTU133	0.00134113	0.00154746	0	0.000790922	0.00065337	0.00288858
d__Bacteria; k__norank_d__Bacteria; p__Deferribacterota; c__Deferribacteres; o__Deferribacterales; f__Deferribacteraceae; g__Mucispirillum; s__Mucispirillum_schaedleri; OTU83	0	0.000171939	0.00588033	0.000309491	6.87758e-05	0		d__Bacteria; k__norank_d__Bacteria; p__Deferribacterota; c__Deferribacteres; o__Deferribacterales; f__Deferribacteraceae; g__Mucispirillum; s__Mucispirillum_schaedleri; OTU83	3.43879e-05	0	0.00883769	3.43879e-05	0	0	d__Bacteria; k__norank_d__Bacteria; p__Deferribacterota; c__Deferribacteres; o__Deferribacterales; f__Deferribacteraceae; g__Mucispirillum; s__Mucispirillum_schaedleri; OTU83	0.00636176	0.00718707	0.0836657	0.022249	0.0127579	0.00251032	d__Bacteria; k__norank_d__Bacteria; p__Deferribacterota; c__Deferribacteres; o__Deferribacterales; f__Deferribacteraceae; g__Mucispirillum; s__Mucispirillum_schaedleri; OTU83	0.0332187	0.00168501	0.00323246	0	0	0.01011
d__Bacteria; k__norank_d__Bacteria; p__Firmicutes; c__Clostridia; o__Oscillospirales; f__Oscillospiraceae; g__Colidextribacter; s__uncultured_bacterium_g__Colidextribacter; OTU63	0.00110041	0.00832187	0.0316713	0.0105915	0.00429849	0.00110041		d__Bacteria; k__norank_d__Bacteria; p__Firmicutes; c__Clostridia; o__Oscillospirales; f__Oscillospiraceae; g__Colidextribacter; s__uncultured_bacterium_g__Colidextribacter; OTU63	0.000722146	0.0011348	0.00347318	0.000103164	0	0	d__Bacteria; k__norank_d__Bacteria; p__Firmicutes; c__Clostridia; o__Oscillospirales; f__Oscillospiraceae; g__Colidextribacter; s__uncultured_bacterium_g__Colidextribacter; OTU63	0.00729023	0.00361073	0.00897524	0.0261692	0.0353164	0.00894085	d__Bacteria; k__norank_d__Bacteria; p__Firmicutes; c__Clostridia; o__Oscillospirales; f__Oscillospiraceae; g__Colidextribacter; s__uncultured_bacterium_g__Colidextribacter; OTU63	0.00275103	0.00416094	0.000103164	3.43879e-05	0.000275103	0.00330124
d__Bacteria; k__norank_d__Bacteria; p__Firmicutes; c__Clostridia; o__Lachnospirales; f__Lachnospiraceae; g__Lachnospiraceae_NK4A136_group; s__unclassified_g__Lachnospiraceae_NK4A136_group; OTU57	0.00306052	0.0011348	0.00495186	0.00385144	0.0051238	0.00168501		d__Bacteria; k__norank_d__Bacteria; p__Firmicutes; c__Clostridia; o__Lachnospirales; f__Lachnospiraceae; g__Lachnospiraceae_NK4A136_group; s__unclassified_g__Lachnospiraceae_NK4A136_group; OTU57	6.87758e-05	0	0	0	0	0	d__Bacteria; k__norank_d__Bacteria; p__Firmicutes; c__Clostridia; o__Lachnospirales; f__Lachnospiraceae; g__Lachnospiraceae_NK4A136_group; s__unclassified_g__Lachnospiraceae_NK4A136_group; OTU57	0.000825309	0.000206327	0.013652	0.000722146	0.00337001	0.000240715	d__Bacteria; k__norank_d__Bacteria; p__Firmicutes; c__Clostridia; o__Lachnospirales; f__Lachnospiraceae; g__Lachnospiraceae_NK4A136_group; s__unclassified_g__Lachnospiraceae_NK4A136_group; OTU57	0.000275103	0.00065337	0	3.43879e-05	0	0.113239
d__Bacteria; k__norank_d__Bacteria; p__Bacteroidota; c__Bacteroidia; o__Bacteroidales; f__Muribaculaceae; g__norank_f__Muribaculaceae; s__uncultured_bacterium_g__norank_f__Muribaculaceae; OTU92	0.000481431	0.00103164	0.0133769	0.00392022	0.0211829	0.00171939		d__Bacteria; k__norank_d__Bacteria; p__Bacteroidota; c__Bacteroidia; o__Bacteroidales; f__Muribaculaceae; g__norank_f__Muribaculaceae; s__uncultured_bacterium_g__norank_f__Muribaculaceae; OTU92	3.43879e-05	0.000171939	0.000171939	0	0	3.43879e-05	d__Bacteria; k__norank_d__Bacteria; p__Bacteroidota; c__Bacteroidia; o__Bacteroidales; f__Muribaculaceae; g__norank_f__Muribaculaceae; s__uncultured_bacterium_g__norank_f__Muribaculaceae; OTU92	0.00422971	0.00116919	0.00168501	0.00433287	0.00103164	3.43879e-05	d__Bacteria; k__norank_d__Bacteria; p__Bacteroidota; c__Bacteroidia; o__Bacteroidales; f__Muribaculaceae; g__norank_f__Muribaculaceae; s__uncultured_bacterium_g__norank_f__Muribaculaceae; OTU92	0.00189133	0.00849381	0	0	0.0085282	0.0662311
d__Bacteria; k__norank_d__Bacteria; p__Firmicutes; c__Bacilli; o__Staphylococcales; f__Staphylococcaceae; g__Staphylococcus; s__Staphylococcus_nepalensis; OTU72	0	0	0.0149931	0.0252407	0.0401994	0		d__Bacteria; k__norank_d__Bacteria; p__Firmicutes; c__Bacilli; o__Staphylococcales; f__Staphylococcaceae; g__Staphylococcus; s__Staphylococcus_nepalensis; OTU72	0	0	0	0	3.43879e-05	0	d__Bacteria; k__norank_d__Bacteria; p__Firmicutes; c__Bacilli; o__Staphylococcales; f__Staphylococcaceae; g__Staphylococcus; s__Staphylococcus_nepalensis; OTU72	0	0	0.00230399	0.0173659	0.000343879	0.0157153	d__Bacteria; k__norank_d__Bacteria; p__Firmicutes; c__Bacilli; o__Staphylococcales; f__Staphylococcaceae; g__Staphylococcus; s__Staphylococcus_nepalensis; OTU72	0	0	0	0	0	0
d__Bacteria; k__norank_d__Bacteria; p__Bacteroidota; c__Bacteroidia; o__Bacteroidales; f__Muribaculaceae; g__Muribaculum; s__uncultured_bacterium_g__Muribaculum; OTU129	6.87758e-05	0.000206327	0.00196011	0.0014099	0.000447043	0.000137552		d__Bacteria; k__norank_d__Bacteria; p__Bacteroidota; c__Bacteroidia; o__Bacteroidales; f__Muribaculaceae; g__Muribaculum; s__uncultured_bacterium_g__Muribaculum; OTU129	0.000687758	0.00237276	0.000378267	3.43879e-05	0	0.000343879	d__Bacteria; k__norank_d__Bacteria; p__Bacteroidota; c__Bacteroidia; o__Bacteroidales; f__Muribaculaceae; g__Muribaculum; s__uncultured_bacterium_g__Muribaculum; OTU129	0.046458	0.0198418	0.00185695	0.0113136	0.00598349	0.00065337	d__Bacteria; k__norank_d__Bacteria; p__Bacteroidota; c__Bacteroidia; o__Bacteroidales; f__Muribaculaceae; g__Muribaculum; s__uncultured_bacterium_g__Muribaculum; OTU129	0.00374828	0.00347318	0	0.000962861	0.00209766	0.00275103
d__Bacteria; k__norank_d__Bacteria; p__Bacteroidota; c__Bacteroidia; o__Bacteroidales; f__Muribaculaceae; g__norank_f__Muribaculaceae; s__uncultured_Bacteroidales_bacterium_g__norank_f__Muribaculaceae; OTU24	0.00185695	0.000825309	0.0121733	0.00825309	0.0747249	0.00811554		d__Bacteria; k__norank_d__Bacteria; p__Bacteroidota; c__Bacteroidia; o__Bacteroidales; f__Muribaculaceae; g__norank_f__Muribaculaceae; s__uncultured_Bacteroidales_bacterium_g__norank_f__Muribaculaceae; OTU24	0	0	0	0	0	0	d__Bacteria; k__norank_d__Bacteria; p__Bacteroidota; c__Bacteroidia; o__Bacteroidales; f__Muribaculaceae; g__norank_f__Muribaculaceae; s__uncultured_Bacteroidales_bacterium_g__norank_f__Muribaculaceae; OTU24	0	0	0	0	0	3.43879e-05	d__Bacteria; k__norank_d__Bacteria; p__Bacteroidota; c__Bacteroidia; o__Bacteroidales; f__Muribaculaceae; g__norank_f__Muribaculaceae; s__uncultured_Bacteroidales_bacterium_g__norank_f__Muribaculaceae; OTU24	0.000206327	0	0	0	0	0
d__Bacteria; k__norank_d__Bacteria; p__Firmicutes; c__Clostridia; o__Oscillospirales; f__Ruminococcaceae; g__norank_f__Ruminococcaceae; s__uncultured_bacterium_g__norank_f__Ruminococcaceae; OTU78	0.000171939	0.00295736	0.0148212	0.0123453	0.0155089	0.00171939		d__Bacteria; k__norank_d__Bacteria; p__Firmicutes; c__Clostridia; o__Oscillospirales; f__Ruminococcaceae; g__norank_f__Ruminococcaceae; s__uncultured_bacterium_g__norank_f__Ruminococcaceae; OTU78	3.43879e-05	0	0.00106602	0	0	0	d__Bacteria; k__norank_d__Bacteria; p__Firmicutes; c__Clostridia; o__Oscillospirales; f__Ruminococcaceae; g__norank_f__Ruminococcaceae; s__uncultured_bacterium_g__norank_f__Ruminococcaceae; OTU78	0.00230399	0.00237276	0.00457359	0.0108322	0.00333563	0.00116919	d__Bacteria; k__norank_d__Bacteria; p__Firmicutes; c__Clostridia; o__Oscillospirales; f__Ruminococcaceae; g__norank_f__Ruminococcaceae; s__uncultured_bacterium_g__norank_f__Ruminococcaceae; OTU78	0.000309491	0.000103164	0.000103164	0	0.000137552	0.0292641
d__Bacteria; k__norank_d__Bacteria; p__Firmicutes; c__Clostridia; o__Lachnospirales; f__Lachnospiraceae; g__Eubacterium_fissicatena_group; s__uncultured_bacterium_g__Eubacterium_fissicatena_group; OTU118	0.000412655	0.00271664	0.0139615	0.00784044	0.00440165	0.00196011		d__Bacteria; k__norank_d__Bacteria; p__Firmicutes; c__Clostridia; o__Lachnospirales; f__Lachnospiraceae; g__Eubacterium_fissicatena_group; s__uncultured_bacterium_g__Eubacterium_fissicatena_group; OTU118	0.00127235	0.00502063	0.00402338	3.43879e-05	3.43879e-05	0	d__Bacteria; k__norank_d__Bacteria; p__Firmicutes; c__Clostridia; o__Lachnospirales; f__Lachnospiraceae; g__Eubacterium_fissicatena_group; s__uncultured_bacterium_g__Eubacterium_fissicatena_group; OTU118	0.00777166	0.000309491	0	0.0103508	3.43879e-05	0.000584594	d__Bacteria; k__norank_d__Bacteria; p__Firmicutes; c__Clostridia; o__Lachnospirales; f__Lachnospiraceae; g__Eubacterium_fissicatena_group; s__uncultured_bacterium_g__Eubacterium_fissicatena_group; OTU118	0.0113824	0.00240715	0	0	0.000894085	0.0206671
d__Bacteria; k__norank_d__Bacteria; p__Actinobacteriota; c__Coriobacteriia; o__Coriobacteriales; f__Eggerthellaceae; g__Adlercreutzia; s__uncultured_bacterium_g__Adlercreutzia; OTU49	0.0131362	0.00481431	0.0455983	0.0141334	0.00763411	0.00526135		d__Bacteria; k__norank_d__Bacteria; p__Actinobacteriota; c__Coriobacteriia; o__Coriobacteriales; f__Eggerthellaceae; g__Adlercreutzia; s__uncultured_bacterium_g__Adlercreutzia; OTU49	0.00240715	0.000447043	0	0	0	0	d__Bacteria; k__norank_d__Bacteria; p__Actinobacteriota; c__Coriobacteriia; o__Coriobacteriales; f__Eggerthellaceae; g__Adlercreutzia; s__uncultured_bacterium_g__Adlercreutzia; OTU49	0.000240715	0.000137552	0.000171939	0.000206327	0.000550206	0	d__Bacteria; k__norank_d__Bacteria; p__Actinobacteriota; c__Coriobacteriia; o__Coriobacteriales; f__Eggerthellaceae; g__Adlercreutzia; s__uncultured_bacterium_g__Adlercreutzia; OTU49	0.000103164	0	0	6.87758e-05	0	0.000103164
d__Bacteria; k__norank_d__Bacteria; p__Proteobacteria; c__Gammaproteobacteria; o__Enterobacterales; f__Hafniaceae; g__Hafnia-Obesumbacterium; s__unclassified_g__Hafnia-Obesumbacterium; OTU367	0	0	3.43879e-05	6.87758e-05	0	0		d__Bacteria; k__norank_d__Bacteria; p__Proteobacteria; c__Gammaproteobacteria; o__Enterobacterales; f__Hafniaceae; g__Hafnia-Obesumbacterium; s__unclassified_g__Hafnia-Obesumbacterium; OTU367	3.43879e-05	0.000171939	0	0	0	0	d__Bacteria; k__norank_d__Bacteria; p__Proteobacteria; c__Gammaproteobacteria; o__Enterobacterales; f__Hafniaceae; g__Hafnia-Obesumbacterium; s__unclassified_g__Hafnia-Obesumbacterium; OTU367	0	0	0	0	0.00116919	0	d__Bacteria; k__norank_d__Bacteria; p__Proteobacteria; c__Gammaproteobacteria; o__Enterobacterales; f__Hafniaceae; g__Hafnia-Obesumbacterium; s__unclassified_g__Hafnia-Obesumbacterium; OTU367	0.00106602	0.00378267	0.00171939	0.0267194	0.0549862	0.0042641
d__Bacteria; k__norank_d__Bacteria; p__Firmicutes; c__Clostridia; o__Lachnospirales; f__Lachnospiraceae; g__Blautia; s__unclassified_g__Blautia; OTU95	0.000206327	0.000309491	0.000618982	0.000447043	0.000137552	6.87758e-05		d__Bacteria; k__norank_d__Bacteria; p__Firmicutes; c__Clostridia; o__Lachnospirales; f__Lachnospiraceae; g__Blautia; s__unclassified_g__Blautia; OTU95	0.000275103	0.0289546	0.00354195	0	0	0.00643054	d__Bacteria; k__norank_d__Bacteria; p__Firmicutes; c__Clostridia; o__Lachnospirales; f__Lachnospiraceae; g__Blautia; s__unclassified_g__Blautia; OTU95	0.000343879	0.000206327	0.000515818	0.000171939	3.43879e-05	6.87758e-05	d__Bacteria; k__norank_d__Bacteria; p__Firmicutes; c__Clostridia; o__Lachnospirales; f__Lachnospiraceae; g__Blautia; s__unclassified_g__Blautia; OTU95	0.000309491	0.000928473	0.0152338	0.00395461	0.00223521	0.000137552
d__Bacteria; k__norank_d__Bacteria; p__Firmicutes; c__Clostridia; o__Lachnospirales; f__Lachnospiraceae; g__unclassified_f__Lachnospiraceae; s__unclassified_f__Lachnospiraceae; OTU377	0	0	0	0	0	0		d__Bacteria; k__norank_d__Bacteria; p__Firmicutes; c__Clostridia; o__Lachnospirales; f__Lachnospiraceae; g__unclassified_f__Lachnospiraceae; s__unclassified_f__Lachnospiraceae; OTU377	0	0	0	6.87758e-05	0	0	d__Bacteria; k__norank_d__Bacteria; p__Firmicutes; c__Clostridia; o__Lachnospirales; f__Lachnospiraceae; g__unclassified_f__Lachnospiraceae; s__unclassified_f__Lachnospiraceae; OTU377	0.00223521	0.00103164	0.00123796	0.000894085	0.0161967	0.000894085	d__Bacteria; k__norank_d__Bacteria; p__Firmicutes; c__Clostridia; o__Lachnospirales; f__Lachnospiraceae; g__unclassified_f__Lachnospiraceae; s__unclassified_f__Lachnospiraceae; OTU377	0.00385144	0.00691197	0.000550206	0	0.000447043	0.0375516
d__Bacteria; k__norank_d__Bacteria; p__Firmicutes; c__Clostridia; o__Lachnospirales; f__Lachnospiraceae; g__norank_f__Lachnospiraceae; s__mouse_gut_metagenome_g__norank; OTU123	6.87758e-05	0.000550206	0.0172283	0.0107978	0.0318432	0.000618982		d__Bacteria; k__norank_d__Bacteria; p__Firmicutes; c__Clostridia; o__Lachnospirales; f__Lachnospiraceae; g__norank_f__Lachnospiraceae; s__mouse_gut_metagenome_g__norank; OTU123	0	0.000137552	0	0	0	0	d__Bacteria; k__norank_d__Bacteria; p__Firmicutes; c__Clostridia; o__Lachnospirales; f__Lachnospiraceae; g__norank_f__Lachnospiraceae; s__mouse_gut_metagenome_g__norank; OTU123	0.000515818	0.000137552	0.000825309	0.000790922	0.0031293	0.000103164	d__Bacteria; k__norank_d__Bacteria; p__Firmicutes; c__Clostridia; o__Lachnospirales; f__Lachnospiraceae; g__norank_f__Lachnospiraceae; s__mouse_gut_metagenome_g__norank; OTU123	6.87758e-05	0	0	0	6.87758e-05	0.00471114
d__Bacteria; k__norank_d__Bacteria; p__Firmicutes; c__Clostridia; o__Lachnospirales; f__Lachnospiraceae; g__Lachnospiraceae_NK4A136_group; s__uncultured_bacterium_g__Lachnospiraceae_NK4A136_group; OTU364	0.000137552	0.0103164	0.0166094	0.0323934	0.00777166	0.000412655		d__Bacteria; k__norank_d__Bacteria; p__Firmicutes; c__Clostridia; o__Lachnospirales; f__Lachnospiraceae; g__Lachnospiraceae_NK4A136_group; s__uncultured_bacterium_g__Lachnospiraceae_NK4A136_group; OTU364	0	0	0	0	0	0	d__Bacteria; k__norank_d__Bacteria; p__Firmicutes; c__Clostridia; o__Lachnospirales; f__Lachnospiraceae; g__Lachnospiraceae_NK4A136_group; s__uncultured_bacterium_g__Lachnospiraceae_NK4A136_group; OTU364	0	0	0	3.43879e-05	0	0	d__Bacteria; k__norank_d__Bacteria; p__Firmicutes; c__Clostridia; o__Lachnospirales; f__Lachnospiraceae; g__Lachnospiraceae_NK4A136_group; s__uncultured_bacterium_g__Lachnospiraceae_NK4A136_group; OTU364	0.000550206	3.43879e-05	0	0	0	0.000240715
d__Bacteria; k__norank_d__Bacteria; p__Actinobacteriota; c__Coriobacteriia; o__Coriobacteriales; f__Eggerthellaceae; g__Enterorhabdus; s__uncultured_bacterium_g__Enterorhabdus; OTU99	0.00316369	0.00144429	0.005674	0.00357634	0.00392022	0.00168501		d__Bacteria; k__norank_d__Bacteria; p__Actinobacteriota; c__Coriobacteriia; o__Coriobacteriales; f__Eggerthellaceae; g__Enterorhabdus; s__uncultured_bacterium_g__Enterorhabdus; OTU99	0.00137552	3.43879e-05	0.000378267	3.43879e-05	0	3.43879e-05	d__Bacteria; k__norank_d__Bacteria; p__Actinobacteriota; c__Coriobacteriia; o__Coriobacteriales; f__Eggerthellaceae; g__Enterorhabdus; s__uncultured_bacterium_g__Enterorhabdus; OTU99	0.00244154	0.00192572	0.00244154	0.00316369	0.026685	0.00237276	d__Bacteria; k__norank_d__Bacteria; p__Actinobacteriota; c__Coriobacteriia; o__Coriobacteriales; f__Eggerthellaceae; g__Enterorhabdus; s__uncultured_bacterium_g__Enterorhabdus; OTU99	0.000309491	0.000447043	0	0.000447043	0.000171939	0.00116919
d__Bacteria; k__norank_d__Bacteria; p__Firmicutes; c__Clostridia; o__Oscillospirales; f__Eubacterium_coprostanoligenes_group; g__norank_f__Eubacterium_coprostanoligenes_group; s__uncultured_bacterium_g__norank_f__Eubacterium_coprostanoligenes_group; OTU197	0.000859697	0.00471114	6.87758e-05	0.00508941	0.00244154	0.00175378		d__Bacteria; k__norank_d__Bacteria; p__Firmicutes; c__Clostridia; o__Oscillospirales; f__Eubacterium_coprostanoligenes_group; g__norank_f__Eubacterium_coprostanoligenes_group; s__uncultured_bacterium_g__norank_f__Eubacterium_coprostanoligenes_group; OTU197	0.00632737	0.000240715	0.000137552	3.43879e-05	0	0	d__Bacteria; k__norank_d__Bacteria; p__Firmicutes; c__Clostridia; o__Oscillospirales; f__Eubacterium_coprostanoligenes_group; g__norank_f__Eubacterium_coprostanoligenes_group; s__uncultured_bacterium_g__norank_f__Eubacterium_coprostanoligenes_group; OTU197	0.0149243	0.00464237	0	0.00925034	0.000275103	0.00171939	d__Bacteria; k__norank_d__Bacteria; p__Firmicutes; c__Clostridia; o__Oscillospirales; f__Eubacterium_coprostanoligenes_group; g__norank_f__Eubacterium_coprostanoligenes_group; s__uncultured_bacterium_g__norank_f__Eubacterium_coprostanoligenes_group; OTU197	0.00175378	0.0045392	0	0	0	0
d__Bacteria; k__norank_d__Bacteria; p__Firmicutes; c__Clostridia; o__Lachnospirales; f__Lachnospiraceae; g__Lachnoclostridium; s__uncultured_bacterium_g__Lachnoclostridium; OTU54	0.0014099	0.00171939	0.0036795	0.00216644	0.00216644	0.00120358		d__Bacteria; k__norank_d__Bacteria; p__Firmicutes; c__Clostridia; o__Lachnospirales; f__Lachnospiraceae; g__Lachnoclostridium; s__uncultured_bacterium_g__Lachnoclostridium; OTU54	0.000378267	0.00147868	0	0	0	0	d__Bacteria; k__norank_d__Bacteria; p__Firmicutes; c__Clostridia; o__Lachnospirales; f__Lachnospiraceae; g__Lachnoclostridium; s__uncultured_bacterium_g__Lachnoclostridium; OTU54	0.00178817	0.000412655	0.000928473	0.00381706	0.0127579	0.00165062	d__Bacteria; k__norank_d__Bacteria; p__Firmicutes; c__Clostridia; o__Lachnospirales; f__Lachnospiraceae; g__Lachnoclostridium; s__uncultured_bacterium_g__Lachnoclostridium; OTU54	0.000103164	0.000240715	0	0	0	0.00337001
d__Bacteria; k__norank_d__Bacteria; p__Firmicutes; c__Clostridia; o__Lachnospirales; f__Lachnospiraceae; g__Lachnospiraceae_NK4A136_group; s__uncultured_bacterium_g__Lachnospiraceae_NK4A136_group; OTU97	0	0	0	0	6.87758e-05	3.43879e-05		d__Bacteria; k__norank_d__Bacteria; p__Firmicutes; c__Clostridia; o__Lachnospirales; f__Lachnospiraceae; g__Lachnospiraceae_NK4A136_group; s__uncultured_bacterium_g__Lachnospiraceae_NK4A136_group; OTU97	0	0	0	0	0	0	d__Bacteria; k__norank_d__Bacteria; p__Firmicutes; c__Clostridia; o__Lachnospirales; f__Lachnospiraceae; g__Lachnospiraceae_NK4A136_group; s__uncultured_bacterium_g__Lachnospiraceae_NK4A136_group; OTU97	0.00196011	0.00130674	0.00216644	0.0031293	0.00103164	0	d__Bacteria; k__norank_d__Bacteria; p__Firmicutes; c__Clostridia; o__Lachnospirales; f__Lachnospiraceae; g__Lachnospiraceae_NK4A136_group; s__uncultured_bacterium_g__Lachnospiraceae_NK4A136_group; OTU97	0	0	0	0	0	0.019326
d__Bacteria; k__norank_d__Bacteria; p__Firmicutes; c__Clostridia; o__Peptostreptococcales-Tissierellales; f__Anaerovoracaceae; g__Family_XIII_AD3011_group; s__unclassified_g__Family_XIII_AD3011_group; OTU103	0	6.87758e-05	0	0	0	0		d__Bacteria; k__norank_d__Bacteria; p__Firmicutes; c__Clostridia; o__Peptostreptococcales-Tissierellales; f__Anaerovoracaceae; g__Family_XIII_AD3011_group; s__unclassified_g__Family_XIII_AD3011_group; OTU103	0.0122077	3.43879e-05	0	3.43879e-05	0	0	d__Bacteria; k__norank_d__Bacteria; p__Firmicutes; c__Clostridia; o__Peptostreptococcales-Tissierellales; f__Anaerovoracaceae; g__Family_XIII_AD3011_group; s__unclassified_g__Family_XIII_AD3011_group; OTU103	0.00440165	0	0	0.00223521	0.00154746	0.00385144	d__Bacteria; k__norank_d__Bacteria; p__Firmicutes; c__Clostridia; o__Peptostreptococcales-Tissierellales; f__Anaerovoracaceae; g__Family_XIII_AD3011_group; s__unclassified_g__Family_XIII_AD3011_group; OTU103	0	0	0	0	0	0
d__Bacteria; k__norank_d__Bacteria; p__Firmicutes; c__Clostridia; o__Lachnospirales; f__Lachnospiraceae; g__Lachnospiraceae_NK4A136_group; s__uncultured_bacterium_g__Lachnospiraceae_NK4A136_group; OTU327	0	0	0	0	6.87758e-05	0		d__Bacteria; k__norank_d__Bacteria; p__Firmicutes; c__Clostridia; o__Lachnospirales; f__Lachnospiraceae; g__Lachnospiraceae_NK4A136_group; s__uncultured_bacterium_g__Lachnospiraceae_NK4A136_group; OTU327	0	0	0	0	0	0	d__Bacteria; k__norank_d__Bacteria; p__Firmicutes; c__Clostridia; o__Lachnospirales; f__Lachnospiraceae; g__Lachnospiraceae_NK4A136_group; s__uncultured_bacterium_g__Lachnospiraceae_NK4A136_group; OTU327	0	0.000584594	6.87758e-05	0	0.00065337	6.87758e-05	d__Bacteria; k__norank_d__Bacteria; p__Firmicutes; c__Clostridia; o__Lachnospirales; f__Lachnospiraceae; g__Lachnospiraceae_NK4A136_group; s__uncultured_bacterium_g__Lachnospiraceae_NK4A136_group; OTU327	0	0	0	0	0	0.0215268
d__Bacteria; k__norank_d__Bacteria; p__Firmicutes; c__Clostridia; o__Lachnospirales; f__Lachnospiraceae; g__Lachnoclostridium; s__uncultured_bacterium_g__Lachnoclostridium; OTU208	0	0.00350757	0.0111417	0.000206327	0.00378267	0.00116919		d__Bacteria; k__norank_d__Bacteria; p__Firmicutes; c__Clostridia; o__Lachnospirales; f__Lachnospiraceae; g__Lachnoclostridium; s__uncultured_bacterium_g__Lachnoclostridium; OTU208	0	0	0	0	0	0	d__Bacteria; k__norank_d__Bacteria; p__Firmicutes; c__Clostridia; o__Lachnospirales; f__Lachnospiraceae; g__Lachnoclostridium; s__uncultured_bacterium_g__Lachnoclostridium; OTU208	0	0	0	0	3.43879e-05	0	d__Bacteria; k__norank_d__Bacteria; p__Firmicutes; c__Clostridia; o__Lachnospirales; f__Lachnospiraceae; g__Lachnoclostridium; s__uncultured_bacterium_g__Lachnoclostridium; OTU208	0	0	0	0	0	3.43879e-05
d__Bacteria; k__norank_d__Bacteria; p__Desulfobacterota; c__Desulfovibrionia; o__Desulfovibrionales; f__Desulfovibrionaceae; g__Desulfovibrio; s__uncultured_bacterium_g__Desulfovibrio; OTU195	0	0	0	0	0	0		d__Bacteria; k__norank_d__Bacteria; p__Desulfobacterota; c__Desulfovibrionia; o__Desulfovibrionales; f__Desulfovibrionaceae; g__Desulfovibrio; s__uncultured_bacterium_g__Desulfovibrio; OTU195	0	0	0	0	0	0	d__Bacteria; k__norank_d__Bacteria; p__Desulfobacterota; c__Desulfovibrionia; o__Desulfovibrionales; f__Desulfovibrionaceae; g__Desulfovibrio; s__uncultured_bacterium_g__Desulfovibrio; OTU195	6.87758e-05	0	0	0.0131018	0.00402338	0.000928473	d__Bacteria; k__norank_d__Bacteria; p__Desulfobacterota; c__Desulfovibrionia; o__Desulfovibrionales; f__Desulfovibrionaceae; g__Desulfovibrio; s__uncultured_bacterium_g__Desulfovibrio; OTU195	0	0	0	0	0	0
d__Bacteria; k__norank_d__Bacteria; p__Firmicutes; c__Clostridia; o__Lachnospirales; f__Lachnospiraceae; g__Blautia; s__Lachnospiraceae_bacterium_DW59; OTU111	0	3.43879e-05	6.87758e-05	0.000206327	3.43879e-05	3.43879e-05		d__Bacteria; k__norank_d__Bacteria; p__Firmicutes; c__Clostridia; o__Lachnospirales; f__Lachnospiraceae; g__Blautia; s__Lachnospiraceae_bacterium_DW59; OTU111	0	0	0	0	0	0	d__Bacteria; k__norank_d__Bacteria; p__Firmicutes; c__Clostridia; o__Lachnospirales; f__Lachnospiraceae; g__Blautia; s__Lachnospiraceae_bacterium_DW59; OTU111	3.43879e-05	0	0	0.000103164	0	0	d__Bacteria; k__norank_d__Bacteria; p__Firmicutes; c__Clostridia; o__Lachnospirales; f__Lachnospiraceae; g__Blautia; s__Lachnospiraceae_bacterium_DW59; OTU111	3.43879e-05	0	0	0	0	0.0144773
others	0.0147524	0.0268569	0.0675722	0.0570151	0.0537827	0.0191197		others	0.00656809	0.00337001	0.0171596	0.00615543	0.00354195	0.00973177	others	0.0488652	0.014099	0.0281293	0.0512036	0.0430536	0.0125172	others	0.0282325	0.0138927	0.00409216	0.00402338	0.0107634	0.0581499
