# Supplementary material for: Modulatory effects of fermentedPolygonatum cyrtonemaHua on immune homeostasis and gut integrity in a dextran-sulfate-sodium-induced colitis model
Source: Royal Society of Chemistry journal article supplement (doi:10.1039/d3fo04556k), 2024-01-01
Supplement: d3fo04556k2.pdf [file d3fo04556k2.pdf]

Supplement Figure 1. Fragmentation pathways of a part of saponins. (A) HPLC-MS chromatogram of FP in positive ion mode. (B) Cyrtoneoside A. (C) kingianoside Z. (D) Kingianoside A.

Supplement Figure 1

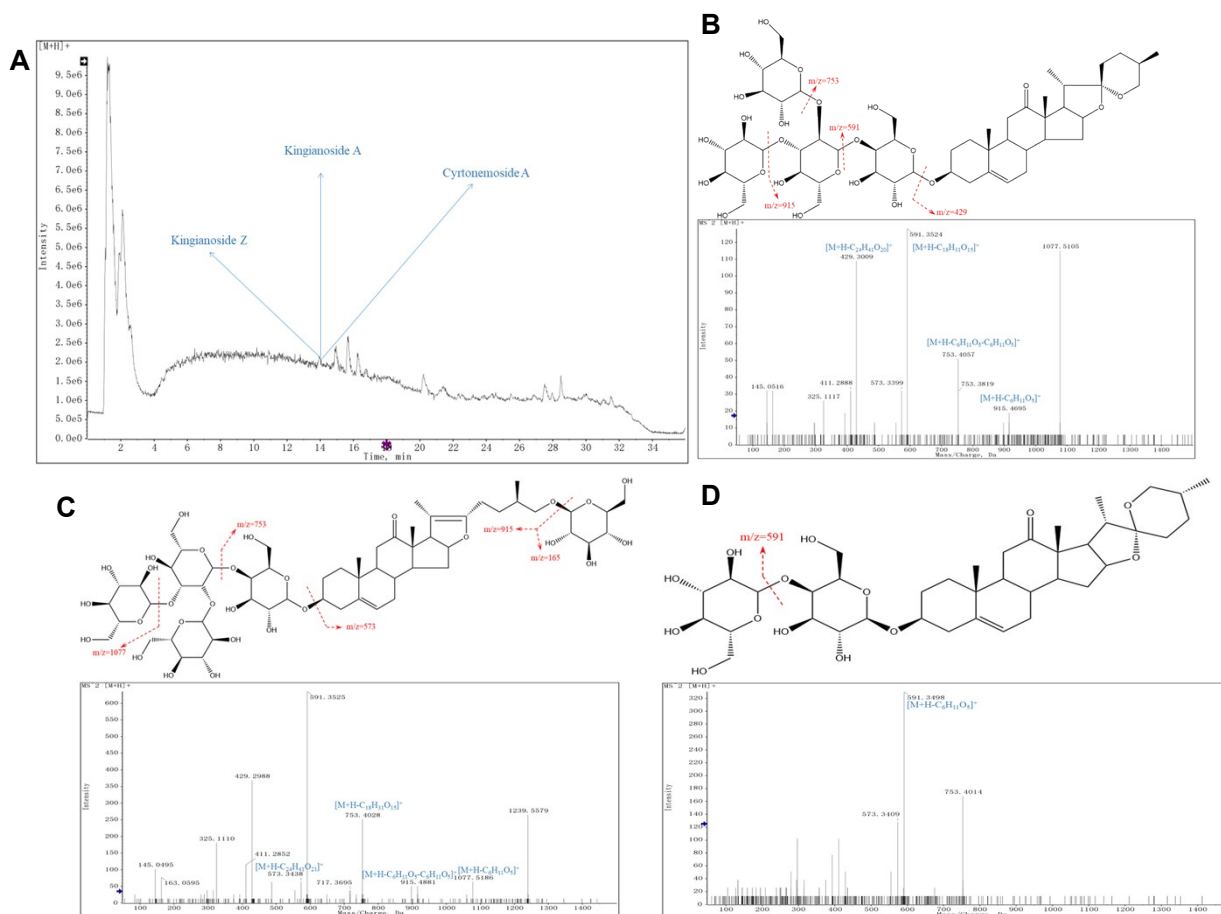

Supplement Figure 2. Effects of FP on diversity and difference analysis of microbiota in colitis mice. (A) Dilution curve of shannon index on OTU level. (B) Hierarchical clustering tree on OTU level (n=6).

Supplement Figure 2

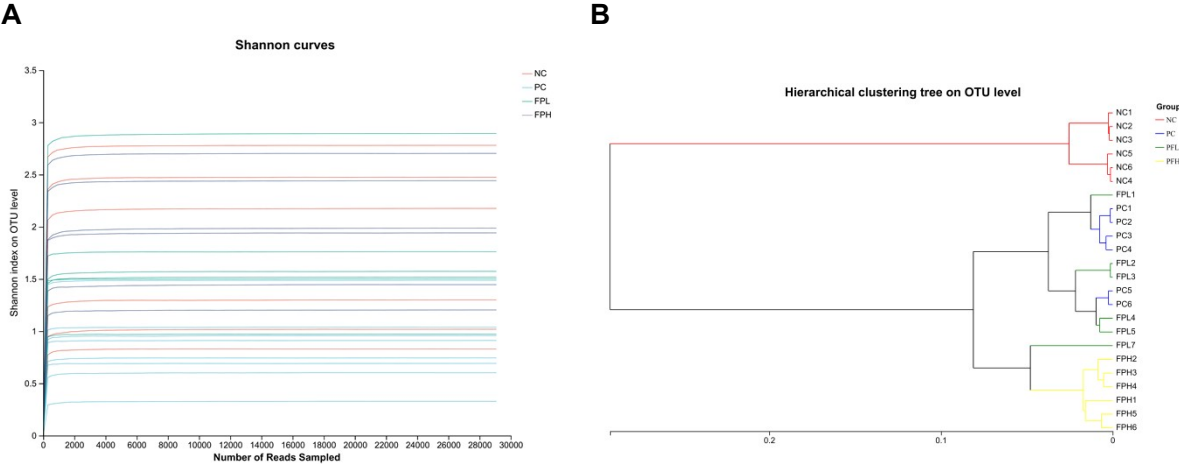

**Supplement Table 1.** AIN93G feed composition

| <b>Ingredients</b>  |             |               |       |                  |         |                  |           |
|---------------------|-------------|---------------|-------|------------------|---------|------------------|-----------|
| Calories            | 3766kcal/kg | Lysine        | 13g   | Calcium          | 5000ppm | Vitamin A        | 4IU/g     |
| Proportion of       | 19.3%       | Methionine    | 4.6g  | Phosphorus       | 3000ppm | Vitamin D        | 1IU/g     |
| Calories in Protein |             |               |       |                  |         |                  |           |
| Proportion of       | 16.7%       | Cystine       | 3.7g  | Potassium        | 3600ppm | Vitamin E        | 0.075IU/g |
| Calories in fat     |             |               |       |                  |         |                  |           |
| Moisture content    | 6.6%        | Tryptophan    | 2.1g  | Sodium           | 1039ppm | Vitamin K        | 0.9 ppm   |
| Fat                 | 7%          | Proline       | 20.5g | Magnesium        | 513ppm  | Thiamine B1      | 5 ppm     |
| Carbohydrates       | 64.3%       | Serine        | 9.7g  | Iron             | 45ppm   | Riboflavin       | 6 ppm     |
| Protein             | 17.8%       | Histidine     | 4.6g  | Zinc             | 38ppm   | Nicotinic acid   | 30 ppm    |
| Ash content         | 4.17%       | Leucine       | 15.4g | Violent          | 10ppm   | Pantothenic acid | 15 ppm    |
| Alanine             | 4.6g        | Isoleucine    | 8.5g  | Copper           | 6ppm    | Vitamin B6       | 6 ppm     |
| Arginine            | 6.4g        | Phenylalanine | 8.8g  | Iodine           | 0.2ppm  | Choline          | 1000 ppm  |
| Aspartic acid       | 12.2g       | Tyrosine      | 9.3g  | Chromium         | 1ppm    | Folic acid       | 2ppm      |
| Glutamic acid       | 36.3g       | Threonine     | 6.7g  | Inorganic sulfur | 300ppm  | Biotin           | 0.2ppm    |
| Glycine             | 3.2g        | Valine        | 10g   | Chlorine         | 1631ppm | Vitamin B12      | 25ppb     |

**Supplement Table 2.** Disease activity index (DAI) score used to evaluate the DSS-induced colitis.

| Weight loss (%) | Stool consistency | Rectum bleeding             | Appearance and vitality   | Score |
|-----------------|-------------------|-----------------------------|---------------------------|-------|
| None            | Normal            | None                        | Normal                    | 0     |
| 0.1-5           | Mildly soft stool | Occasionally stool bleeding | Slightly poor condition   | 1     |
| 5 -10           | Very soft stool   | Always stool bleeding       | Moderately poor condition | 2     |
| ≥10             | Watery stool      | All stool bleeding          | Seriously poor condition  | 3     |

**Supplement Table 3.** Gene primers used for real-time quantitative qPCR in this study

| Primer               | Forward primer          | Reverse primer           |
|----------------------|-------------------------|--------------------------|
| IL10rb               | CTCGACTCAGTGC GACTTCTC  | CGAATGTTTCATCCGCCAATTCAG |
| IL17R (CD127)        | GCGGACGATCACTCCTTCTG    | AGCCCCACATATTTGAAATTCCA  |
| IL17Ra               | GGGAGTCCCTATGTAGGTTCC   | TCCAACATTTGTCACTTGCTCT   |
| IL17a (IL17)         | TCAGCGTGTC AAAACTGAG    | CGCCAAGGGAGTTAAAGACTT    |
| TGF- $\beta$ (Tgfb1) | CCACCTGCAAGACCATCGAC    | CTGGCGAGCCTTAGTTTGGAC    |
| IL1 $\beta$          | GAAATGCCACCTTTTGACAGTG  | TGGATGCTCTCATCAGGACAG    |
| IL33                 | ATTTCCCCGGCAAAGTTCAG    | AACGGAGTCTCATGCAGTAGA    |
| LT $\beta$           | TGGCAGGAGCTACTCCCT      | TCCAGTCTTTTCTGAGCCTGT    |
| NOD2                 | CAGGTCTCCGAGAGGGTACTG   | GCTACGGATGAGCCAAATGAAG   |
| STAT5 (Stat5a)       | CAGATGCAAGTGTGTATGGGC   | GCTGGCTCTCGATCCACTG      |
| IL21                 | GGACCCTTGTCTGTCTGGTAG   | TGTGGAGCTGATAGAAGTTCAGG  |
| IL22                 | ATGAGTTTTTCCCTTATGGGGAC | GCTGGAAGTTGGACACCTCAA    |
| IL23 (IL23a)         | CAGCAGCTCTCTCGGAATCTC   | TGGATACGGGGCACCATTATTTTT |
| IL23R                | AACAACAGCTCGGATTTGGTAT  | ATGACCAGGACATTACAGCAGT   |
| ROR $\alpha$         | GTGGAGACAAATCGTCAGGAAT  | TGGTCCGATCAATCAAACAGTTC  |
| ROR $\gamma$ t       | TCCACTACGGGGTTATCACCT   | AGTAGGCCACATTACACTGCT    |
| MPO                  | AGGGCCGCTGATTATCTACAT   | CTCACGTCCTGATAGGCACA     |
| Cd14                 | ACTTCTCAGATCCGAAGCCAG   | CCGCCGTACAATTCCACAT      |
| Cd80                 | TCAGTTGATGCAGGATACACCA  | AAAGACGAATCAGCAGCACAA    |
| Cd86                 | TCAATGGGACTGCATATCTGCC  | GCCAAAATACTACCAGCTCACT   |
| CD94                 | ATGCTGTGTTTGCCTGGACAA   | GCTCTGGCCTGATAACTGAGAAT  |
| Jak2                 | GGAATGGCCTGCCTTACAATG   | TGGCTCTATCTGCTTACAGAAT   |
| FasL                 | CAGCCCATGAATTACCCATGT   | ATTTGTGTTGTGGTCCCTTCTTCT |
| Nfkb1                | ATGGCAGACGATGATCCCTAC   | CGGAATCGAAATCCCCTCTGTT   |
| Ripk2                | ATCCCGTACCACAAGCTCG     | ACTATGCCCAAAAATTCAGGCTC  |
| Tirap                | CCTCCACTCCGTCCAAGAAG    | TGAACCATCATAGAGGTGGCTTT  |
| Bcl11 $\beta$        | CCCGACCCTGATCTACTCAC    | GGAGGTGGACTGCTCTTGT      |
| GF11                 | AGAAGGCGCACAGCTATCAC    | GGCTCCATTTTCGACTCGC      |
| AhR                  | GCCCTTCCCGCAAGATGTTAT   | TCAGCAGGGGTGGACTTTAAT    |
| Id2                  | TCCGGTGAGGTCCGTTAGG     | CAGACTCATCGGGTTCGTCC     |
| TOX                  | TGCCATTAAGGGCCAGAATCC   | TCAGGTATTCCTTCTTTGCAGC   |
| LBP                  | GATCACCGACAAGGGCCTG     | CCGCTGAAGTCCGGTAGTG      |
| FOXP3                | CACCTATGCCACCCTTATCCG   | CATGCGAGTAAACCAATGGTAGA  |
| TLr2                 | CTCTTCAGCAAACGCTGTTCT   | GGCGTCTCCCTCTATTGTATTG   |
| TLr3                 | GTGAGATACAACGTAGCTGACTG | TCCTGCATCCAAGATAGCAAGT   |
| TLr5                 | TGGGGACCCAGTATGCTAACT   | CCACAGGAAAACAGCCGAAGT    |
| TLr6                 | AGCCAAGACAGAAAACCCATC   | GGGGTCATGCTTCCGACTAT     |
| TLr7                 | ATGTGGACACGGAAGAGACAA   | ACCATCGAAACCCAAAGACTC    |
| TLr9                 | ATGGTTCTCCGTCGAAGGACT   | GAGGCTTCAGCTCACAGGG      |
| PPAR- $\gamma$       | GGAAGACCACTCGCATTCCTT   | GTAATCAGCAACCATTGGGTCA   |

|               |                         |                         |
|---------------|-------------------------|-------------------------|
| CCR6          | TGGGCCATGCTCCCTAGAA     | GGTGAGGACAAAGAGTATGTCTG |
| ZO1 (Tjp1)    | GCCGCTAAGAGCACAGCAA     | GCCCTCCTTTTAACACATCAGA  |
| Muc2          | AGGGCTCGGAACTCCAGAAA    | CCAGGGAATCGGTAGACATCG   |
| Occludin      | TGAAAGTCCACCTCCTTACAGA  | CCGATAAAAAGAGTACGCTGG   |
| claudin-2     | CAACTGGTGGGCTACATCCTA   | ATCCAGAGGCCCTTGAAAAAG   |
| claudin1      | TGCCCCAGTGGAAGATTTACT   | CTTTGCGAAACGCAGGACAT    |
| claudin3      | ACCAACTGCGTACAAGACGAG   | CGGGCACCAACGGGTTATAG    |
| MCP-1         | TAAAAACCTGGATCGGAACCAA  | GCATTAGCTTCAGATTTACGGGT |
| MUC4          | CCTCCTCTTGCTACCTGATGC   | GGAAGTTGGAGTATCCCTTGTTG |
| TNF- $\alpha$ | CAGGCGGTGCCTATGTCTC     | CGATCACCCCGAAGTTCAGTAG  |
| IL-1 $\beta$  | GAAATGCCACCTTTTGACAGTG  | TGGATGCTCTCATCAGGACAG   |
| IL-6          | CTGCAAGAGACTTCCATCCAG   | AGTGGTATAGACAGGTCTGTTGG |
| IL-10         | CTTACTGACTGGCATGAGGATCA | GCAGCTCTAGGAGCATGTGG    |
| IL-18         | GTGAACCCAGACCAGACTG     | CCTGGAACACGTTTCTGAAAGA  |
| IFN- $\gamma$ | GCCACGGCACAGTCATTGA     | TGCTGATGGCCTGATTGTCTT   |
| IL-2          | TGAGCAGGATGGAGAATTACAGG | GTCCAAGTTCATCTTCTAGGCAC |
| IL-4          | GGTCTCAACCCCAAGCTAGT    | GCCGATGATCTCTCTCAAGTGAT |
| IL-5          | GCAATGAGACGATGAGGCTTC   | GCCCCTGAAAGATTTCTCCAATG |
| GM-CSF        | GGCCTTGGAAGCATGTAGAGG   | GGAGAACTCGTTAGAGACGACTT |
| F4/80         | CTCAGTCTGCACCAATATCCTG  | CCACAGAGTTAGAGCAGTTGGAA |
| GAPDH         | AGGTCGGTGTGAACGGATTTG   | GGGGTCGTTGATGGCAACA     |

**Supplement Table 4.** Average body weight (gram), mean  $\pm$  SD (n=12).

| Day | NC                            | PC             | FPL            | FPH                           |
|-----|-------------------------------|----------------|----------------|-------------------------------|
| 0   | 19.9 $\pm$ 0.9                | 20.2 $\pm$ 0.8 | 19.8 $\pm$ 1.1 | 20.2 $\pm$ 1.0                |
| 1   | 19.4 $\pm$ 1.0                | 19.7 $\pm$ 0.7 | 19.2 $\pm$ 0.9 | 20.1 $\pm$ 1.1                |
| 2   | 18.9 $\pm$ 0.9                | 19.1 $\pm$ 0.9 | 18.7 $\pm$ 0.7 | 19.4 $\pm$ 1.0                |
| 3   | 18.6 $\pm$ 0.9                | 18.8 $\pm$ 0.8 | 18.6 $\pm$ 0.9 | 19.4 $\pm$ 1.1                |
| 4   | 18.6 $\pm$ 0.9                | 18.6 $\pm$ 0.8 | 18.7 $\pm$ 0.8 | 19.6 $\pm$ 0.9                |
| 5   | 18.1 $\pm$ 1.0                | 18.4 $\pm$ 0.6 | 18.3 $\pm$ 1.0 | 18.9 $\pm$ 0.8                |
| 6   | 18.3 $\pm$ 0.8                | 18.7 $\pm$ 0.9 | 18.6 $\pm$ 1.0 | 19.1 $\pm$ 0.9                |
| 7   | 18.4 $\pm$ 0.9                | 18.6 $\pm$ 0.8 | 18.6 $\pm$ 0.9 | 19.2 $\pm$ 0.9                |
| 8   | 18.9 $\pm$ 1.0                | 19.2 $\pm$ 0.7 | 18.5 $\pm$ 0.8 | 19.6 $\pm$ 1.0                |
| 9   | 18.7 $\pm$ 1.0                | 18.8 $\pm$ 0.8 | 18.9 $\pm$ 1.1 | 19.3 $\pm$ 1.0                |
| 10  | 18.7 $\pm$ 1.0                | 18.8 $\pm$ 0.7 | 19.0 $\pm$ 0.8 | 19.5 $\pm$ 0.8                |
| 11  | 18.6 $\pm$ 0.8                | 18.6 $\pm$ 0.9 | 18.8 $\pm$ 1.0 | 19.7 $\pm$ 0.9 <sup>^</sup>   |
| 12  | 18.7 $\pm$ 0.7 <sup>^^</sup>  | 17.6 $\pm$ 1.1 | 18.1 $\pm$ 0.9 | 19.8 $\pm$ 0.9 <sup>^^^</sup> |
| 13  | 19.0 $\pm$ 0.9 <sup>^^^</sup> | 16.5 $\pm$ 1.4 | 16.9 $\pm$ 1.1 | 19.5 $\pm$ 1.0 <sup>^^^</sup> |
| 14  | 19.0 $\pm$ 1.0 <sup>^^^</sup> | 15.7 $\pm$ 1.6 | 16.2 $\pm$ 1.3 | 18.9 $\pm$ 0.9 <sup>^^^</sup> |

“\*” Significantly different from the PC groups (p<0.05).

“\*\*” Significantly different from the PC groups (p<0.01).

“\*\*\*” Significantly different from the PC groups (p<0.0001).
